# Supplementary material for: Anomaly Detection Models for SARS-CoV-2 Surveillance Based on Genome k-mers
Source: MDPI journal article supplement (doi:10.3390/microorganisms11112773), 2023-11-15
Supplement: s1 [file s1]

# Supplementary data

## Part 1

In the supplementary data of Part 1 (Tables S1–S5), we provided the results of the text method test when only VOC was considered as a critical variant.

**Table S1.** Evaluation metrics of new variant detection.

| Model            | MCC    | F1_score | Precision | Recall | Accuracy | Specificity | AUC   |
|------------------|--------|----------|-----------|--------|----------|-------------|-------|
| AutoEncoder [34] | −0.031 | 0.000    | 0.000     | 0.000  | 0.858    | 0.863       | 0.431 |
|                  | −0.008 | 0.013    | 0.007     | 0.235  | 0.720    | 0.724       | 0.480 |
|                  | −0.009 | 0.000    | 0.000     | 0.000  | 0.937    | 0.938       | 0.469 |
| ECOD [30]        | −0.029 | 0.000    | 0.000     | 0.000  | 0.868    | 0.873       | 0.436 |
|                  | 0.023  | 0.025    | 0.013     | 0.235  | 0.850    | 0.855       | 0.545 |
|                  | −0.009 | 0.000    | 0.000     | 0.000  | 0.945    | 0.946       | 0.473 |
| IForest [33]     | −0.030 | 0.000    | 0.000     | 0.000  | 0.864    | 0.869       | 0.434 |
|                  | 0.002  | 0.016    | 0.008     | 0.235  | 0.769    | 0.773       | 0.504 |
|                  | −0.009 | 0.000    | 0.000     | 0.000  | 0.938    | 0.939       | 0.470 |
| KNN [32]         | 0.107  | 0.048    | 0.025     | 0.667  | 0.842    | 0.843       | 0.755 |
|                  | 0.129  | 0.048    | 0.024     | 1.000  | 0.678    | 0.676       | 0.838 |
|                  | 0.042  | 0.010    | 0.005     | 0.556  | 0.858    | 0.859       | 0.707 |
| LUNAR [35]       | 0.037  | 0.024    | 0.013     | 0.333  | 0.840    | 0.843       | 0.588 |
|                  | 0.183  | 0.080    | 0.041     | 1.000  | 0.813    | 0.812       | 0.906 |
|                  | 0.019  | 0.006    | 0.003     | 0.333  | 0.857    | 0.858       | 0.596 |
| OCSVM [31]       | −0.028 | 0.000    | 0.000     | 0.000  | 0.879    | 0.885       | 0.442 |
|                  | 0.007  | 0.018    | 0.010     | 0.176  | 0.847    | 0.853       | 0.515 |
|                  | 0.040  | 0.011    | 0.005     | 0.444  | 0.896    | 0.897       | 0.671 |

**Table S2.** Evaluation metrics of critical variant detection.

| Model            | MCC    | F1_score | Precision | Recall | Accuracy | Specificity | AUC   |
|------------------|--------|----------|-----------|--------|----------|-------------|-------|
| AutoEncoder [34] | 0.504  | 0.719    | 0.808     | 0.647  | 0.747    | 0.847       | 0.747 |
|                  | 0.550  | 0.724    | 0.869     | 0.620  | 0.763    | 0.907       | 0.763 |
|                  | 0.503  | 0.683    | 0.859     | 0.567  | 0.737    | 0.907       | 0.737 |
|                  | 0.548  | 0.726    | 0.862     | 0.627  | 0.763    | 0.900       | 0.763 |
|                  | 0.591  | 0.758    | 0.877     | 0.667  | 0.787    | 0.907       | 0.787 |
| ECOD [30]        | 0.118  | 0.346    | 0.621     | 0.240  | 0.547    | 0.853       | 0.547 |
|                  | 0.112  | 0.257    | 0.649     | 0.160  | 0.537    | 0.913       | 0.537 |
|                  | 0.089  | 0.254    | 0.615     | 0.160  | 0.530    | 0.900       | 0.530 |
|                  | 0.109  | 0.265    | 0.641     | 0.167  | 0.537    | 0.907       | 0.537 |
|                  | 0.156  | 0.325    | 0.681     | 0.213  | 0.557    | 0.900       | 0.557 |
| IForest [33]     | 0.150  | 0.371    | 0.650     | 0.260  | 0.560    | 0.860       | 0.560 |
|                  | 0.091  | 0.246    | 0.622     | 0.153  | 0.530    | 0.907       | 0.530 |
|                  | 0.240  | 0.408    | 0.750     | 0.280  | 0.593    | 0.907       | 0.593 |
|                  | 0.138  | 0.315    | 0.660     | 0.207  | 0.550    | 0.893       | 0.550 |
|                  | 0.343  | 0.523    | 0.806     | 0.387  | 0.647    | 0.907       | 0.647 |
| KNN [32]         | 0.129  | 0.341    | 0.636     | 0.233  | 0.550    | 0.867       | 0.550 |
|                  | 0.243  | 0.402    | 0.759     | 0.273  | 0.593    | 0.913       | 0.593 |
|                  | 0.204  | 0.347    | 0.739     | 0.227  | 0.573    | 0.920       | 0.573 |
|                  | 0.113  | 0.289    | 0.636     | 0.187  | 0.540    | 0.893       | 0.540 |
|                  | 0.169  | 0.348    | 0.686     | 0.233  | 0.563    | 0.893       | 0.563 |
| LUNAR [35]       | 0.596  | 0.774    | 0.855     | 0.707  | 0.793    | 0.880       | 0.793 |
|                  | 0.696  | 0.829    | 0.912     | 0.760  | 0.843    | 0.927       | 0.843 |
|                  | 0.669  | 0.806    | 0.915     | 0.720  | 0.827    | 0.933       | 0.827 |
|                  | 0.702  | 0.844    | 0.878     | 0.813  | 0.850    | 0.887       | 0.850 |
|                  | 0.651  | 0.801    | 0.893     | 0.727  | 0.820    | 0.913       | 0.820 |
| OCSVM [31]       | -0.029 | 0.207    | 0.465     | 0.133  | 0.490    | 0.847       | 0.490 |
|                  | 0.033  | 0.188    | 0.548     | 0.113  | 0.510    | 0.907       | 0.510 |
|                  | 0.000  | 0.167    | 0.500     | 0.100  | 0.500    | 0.900       | 0.500 |
|                  | -0.047 | 0.125    | 0.423     | 0.073  | 0.487    | 0.900       | 0.487 |
|                  | 0.000  | 0.185    | 0.500     | 0.113  | 0.500    | 0.887       | 0.500 |

**Table S3.** Evaluation metrics of new critical variant detection.

| Model                   | MCC    | F1_score | Precision | Recall | Accuracy | Specificity | AUC   |
|-------------------------|--------|----------|-----------|--------|----------|-------------|-------|
| AutoEncoder [34]        | -0.025 | 0.000    | 0.000     | 0.000  | 0.860    | 0.863       | 0.432 |
|                         | -0.008 | 0.013    | 0.007     | 0.235  | 0.720    | 0.724       | 0.480 |
|                         | -0.009 | 0.000    | 0.000     | 0.000  | 0.937    | 0.938       | 0.469 |
| ECOD [30]               | -0.024 | 0.000    | 0.000     | 0.000  | 0.870    | 0.873       | 0.437 |
|                         | 0.023  | 0.025    | 0.013     | 0.235  | 0.850    | 0.855       | 0.545 |
|                         | -0.009 | 0.000    | 0.000     | 0.000  | 0.945    | 0.946       | 0.473 |
| IForest [33]            | -0.024 | 0.000    | 0.000     | 0.000  | 0.870    | 0.873       | 0.437 |
|                         | 0.008  | 0.018    | 0.009     | 0.294  | 0.742    | 0.746       | 0.520 |
|                         | -0.009 | 0.000    | 0.000     | 0.000  | 0.939    | 0.940       | 0.470 |
| KNN [32]                | 0.144  | 0.048    | 0.025     | 1.000  | 0.844    | 0.843       | 0.922 |
|                         | 0.129  | 0.048    | 0.024     | 1.000  | 0.678    | 0.676       | 0.838 |
|                         | 0.042  | 0.010    | 0.005     | 0.556  | 0.858    | 0.859       | 0.707 |
| LUNAR [35]              | 0.051  | 0.021    | 0.011     | 0.500  | 0.814    | 0.815       | 0.658 |
|                         | 0.227  | 0.112    | 0.059     | 1.000  | 0.872    | 0.871       | 0.935 |
|                         | 0.034  | 0.007    | 0.003     | 0.667  | 0.748    | 0.748       | 0.707 |
| OCSVM [31]              | -0.023 | 0.000    | 0.000     | 0.000  | 0.881    | 0.885       | 0.442 |
|                         | 0.007  | 0.018    | 0.010     | 0.176  | 0.847    | 0.853       | 0.515 |
|                         | 0.040  | 0.011    | 0.005     | 0.444  | 0.896    | 0.897       | 0.671 |
| AutoEncoder+AutoEncoder | -0.025 | 0.000    | 0.000     | 0.000  | 0.860    | 0.863       | 0.432 |
|                         | -0.008 | 0.013    | 0.007     | 0.235  | 0.720    | 0.724       | 0.480 |
|                         | 0.000  | 0.000    | 0.000     | 0.000  | 0.999    | 1.000       | 0.500 |
| AutoEncoder+ECOD        | -0.024 | 0.000    | 0.000     | 0.000  | 0.872    | 0.875       | 0.438 |
|                         | -0.021 | 0.004    | 0.002     | 0.029  | 0.891    | 0.898       | 0.464 |
|                         | -0.001 | 0.000    | 0.000     | 0.000  | 0.997    | 0.999       | 0.499 |
| AutoEncoder+IForest     | -0.024 | 0.000    | 0.000     | 0.000  | 0.868    | 0.871       | 0.436 |
|                         | 0.010  | 0.019    | 0.010     | 0.235  | 0.802    | 0.807       | 0.521 |
|                         | 0.000  | 0.000    | 0.000     | 0.000  | 0.999    | 1.000       | 0.500 |
| AutoEncoder+KNN         | -0.024 | 0.000    | 0.000     | 0.000  | 0.872    | 0.875       | 0.438 |
|                         | -0.008 | 0.013    | 0.007     | 0.235  | 0.722    | 0.726       | 0.481 |
|                         | 0.000  | 0.000    | 0.000     | 0.000  | 0.999    | 1.000       | 0.500 |
| AutoEncoder+LUNAR       | -0.025 | 0.000    | 0.000     | 0.000  | 0.864    | 0.867       | 0.434 |
|                         | -0.008 | 0.013    | 0.007     | 0.235  | 0.720    | 0.724       | 0.480 |
|                         | 0.000  | 0.000    | 0.000     | 0.000  | 0.999    | 1.000       | 0.500 |
| AutoEncoder+OCSVM       | -0.023 | 0.000    | 0.000     | 0.000  | 0.881    | 0.885       | 0.442 |
|                         | 0.014  | 0.021    | 0.011     | 0.206  | 0.844    | 0.849       | 0.527 |
|                         | -0.009 | 0.000    | 0.000     | 0.000  | 0.937    | 0.938       | 0.469 |
| ECOD+AutoEncoder        | -0.024 | 0.000    | 0.000     | 0.000  | 0.872    | 0.875       | 0.438 |
|                         | 0.023  | 0.025    | 0.013     | 0.235  | 0.850    | 0.855       | 0.545 |
|                         | 0.000  | 0.000    | 0.000     | 0.000  | 0.999    | 1.000       | 0.500 |
| ECOD+ECOD               | -0.024 | 0.000    | 0.000     | 0.000  | 0.872    | 0.875       | 0.438 |
|                         | -0.013 | 0.008    | 0.005     | 0.059  | 0.889    | 0.895       | 0.477 |

|                     |        |       |       |       |       |       |       |
|---------------------|--------|-------|-------|-------|-------|-------|-------|
|                     | -0.001 | 0.000 | 0.000 | 0.000 | 0.997 | 0.999 | 0.499 |
| ECOD+IForest        | -0.024 | 0.000 | 0.000 | 0.000 | 0.870 | 0.873 | 0.437 |
|                     | 0.023  | 0.025 | 0.013 | 0.235 | 0.850 | 0.855 | 0.545 |
|                     | 0.000  | 0.000 | 0.000 | 0.000 | 0.999 | 1.000 | 0.500 |
| ECOD+KNN            | -0.023 | 0.000 | 0.000 | 0.000 | 0.875 | 0.879 | 0.439 |
|                     | 0.023  | 0.025 | 0.013 | 0.235 | 0.850 | 0.855 | 0.545 |
|                     | 0.000  | 0.000 | 0.000 | 0.000 | 0.999 | 1.000 | 0.500 |
| ECOD+LUNAR          | -0.024 | 0.000 | 0.000 | 0.000 | 0.872 | 0.875 | 0.438 |
|                     | 0.023  | 0.025 | 0.013 | 0.235 | 0.850 | 0.855 | 0.545 |
|                     | 0.000  | 0.000 | 0.000 | 0.000 | 0.999 | 1.000 | 0.500 |
| ECOD+OCSVM          | -0.023 | 0.000 | 0.000 | 0.000 | 0.881 | 0.885 | 0.442 |
|                     | 0.017  | 0.022 | 0.012 | 0.206 | 0.855 | 0.860 | 0.533 |
|                     | -0.009 | 0.000 | 0.000 | 0.000 | 0.945 | 0.946 | 0.473 |
| IForest+AutoEncoder | -0.023 | 0.000 | 0.000 | 0.000 | 0.877 | 0.881 | 0.440 |
|                     | 0.017  | 0.022 | 0.011 | 0.235 | 0.830 | 0.835 | 0.535 |
|                     | 0.000  | 0.000 | 0.000 | 0.000 | 0.999 | 1.000 | 0.500 |
| IForest+ECOD        | -0.023 | 0.000 | 0.000 | 0.000 | 0.875 | 0.879 | 0.439 |
|                     | -0.022 | 0.004 | 0.002 | 0.029 | 0.891 | 0.898 | 0.464 |
|                     | -0.001 | 0.000 | 0.000 | 0.000 | 0.997 | 0.999 | 0.499 |
| IForest+IForest     | -0.023 | 0.000 | 0.000 | 0.000 | 0.877 | 0.881 | 0.440 |
|                     | 0.013  | 0.020 | 0.011 | 0.206 | 0.840 | 0.845 | 0.526 |
|                     | 0.000  | 0.000 | 0.000 | 0.000 | 0.999 | 1.000 | 0.500 |
| IForest+KNN         | -0.024 | 0.000 | 0.000 | 0.000 | 0.874 | 0.877 | 0.438 |
|                     | 0.013  | 0.020 | 0.010 | 0.294 | 0.762 | 0.765 | 0.530 |
|                     | 0.000  | 0.000 | 0.000 | 0.000 | 0.999 | 1.000 | 0.500 |
| IForest+LUNAR       | -0.023 | 0.000 | 0.000 | 0.000 | 0.875 | 0.879 | 0.439 |
|                     | 0.022  | 0.024 | 0.012 | 0.265 | 0.825 | 0.830 | 0.547 |
|                     | 0.000  | 0.000 | 0.000 | 0.000 | 0.999 | 1.000 | 0.500 |
| IForest+OCSVM       | -0.023 | 0.000 | 0.000 | 0.000 | 0.881 | 0.885 | 0.442 |
|                     | 0.013  | 0.021 | 0.011 | 0.206 | 0.843 | 0.848 | 0.527 |
|                     | -0.009 | 0.000 | 0.000 | 0.000 | 0.939 | 0.940 | 0.470 |
| KNN+AutoEncoder     | -0.024 | 0.000 | 0.000 | 0.000 | 0.870 | 0.873 | 0.437 |
|                     | 0.018  | 0.021 | 0.011 | 0.324 | 0.759 | 0.763 | 0.543 |
|                     | 0.000  | 0.000 | 0.000 | 0.000 | 0.999 | 1.000 | 0.500 |
| KNN+ECOD            | -0.023 | 0.000 | 0.000 | 0.000 | 0.875 | 0.879 | 0.439 |
|                     | -0.021 | 0.004 | 0.002 | 0.029 | 0.894 | 0.901 | 0.465 |
|                     | -0.003 | 0.000 | 0.000 | 0.000 | 0.991 | 0.993 | 0.496 |
| KNN+IForest         | -0.023 | 0.000 | 0.000 | 0.000 | 0.875 | 0.879 | 0.439 |
|                     | 0.006  | 0.018 | 0.009 | 0.235 | 0.789 | 0.794 | 0.514 |
|                     | 0.000  | 0.000 | 0.000 | 0.000 | 0.999 | 1.000 | 0.500 |
| KNN+KNN             | 0.144  | 0.048 | 0.025 | 1.000 | 0.844 | 0.843 | 0.922 |
|                     | 0.099  | 0.045 | 0.023 | 0.735 | 0.749 | 0.749 | 0.742 |
|                     | 0.000  | 0.000 | 0.000 | 0.000 | 0.999 | 1.000 | 0.500 |

|                   |        |       |       |       |       |       |       |
|-------------------|--------|-------|-------|-------|-------|-------|-------|
| KNN+LUNAR         | 0.065  | 0.027 | 0.014 | 0.500 | 0.858 | 0.859 | 0.680 |
|                   | 0.129  | 0.048 | 0.024 | 1.000 | 0.679 | 0.676 | 0.838 |
|                   | 0.000  | 0.000 | 0.000 | 0.000 | 0.999 | 1.000 | 0.500 |
| KNN+OCSVM         | -0.022 | 0.000 | 0.000 | 0.000 | 0.885 | 0.889 | 0.444 |
|                   | 0.012  | 0.020 | 0.011 | 0.206 | 0.839 | 0.844 | 0.525 |
|                   | 0.042  | 0.010 | 0.005 | 0.556 | 0.858 | 0.859 | 0.707 |
| LUNAR+AutoEncoder | -0.025 | 0.000 | 0.000 | 0.000 | 0.860 | 0.863 | 0.432 |
|                   | 0.050  | 0.037 | 0.019 | 0.324 | 0.862 | 0.867 | 0.595 |
|                   | 0.000  | 0.000 | 0.000 | 0.000 | 0.999 | 1.000 | 0.500 |
| LUNAR+ECOD        | -0.024 | 0.000 | 0.000 | 0.000 | 0.874 | 0.877 | 0.438 |
|                   | -0.002 | 0.014 | 0.007 | 0.088 | 0.898 | 0.905 | 0.496 |
|                   | -0.005 | 0.000 | 0.000 | 0.000 | 0.981 | 0.983 | 0.491 |
| LUNAR+IForest     | -0.024 | 0.000 | 0.000 | 0.000 | 0.874 | 0.877 | 0.438 |
|                   | 0.010  | 0.019 | 0.010 | 0.206 | 0.831 | 0.836 | 0.521 |
|                   | 0.000  | 0.000 | 0.000 | 0.000 | 0.999 | 1.000 | 0.500 |
| LUNAR+KNN         | 0.063  | 0.026 | 0.014 | 0.500 | 0.854 | 0.855 | 0.678 |
|                   | 0.162  | 0.086 | 0.046 | 0.735 | 0.874 | 0.875 | 0.805 |
|                   | 0.000  | 0.000 | 0.000 | 0.000 | 0.999 | 1.000 | 0.500 |
| LUNAR+LUNAR       | 0.125  | 0.038 | 0.019 | 1.000 | 0.800 | 0.800 | 0.900 |
|                   | 0.206  | 0.103 | 0.055 | 0.912 | 0.872 | 0.872 | 0.892 |
|                   | 0.000  | 0.000 | 0.000 | 0.000 | 0.999 | 1.000 | 0.500 |
| LUNAR+OCSVM       | -0.022 | 0.000 | 0.000 | 0.000 | 0.883 | 0.887 | 0.443 |
|                   | 0.024  | 0.026 | 0.014 | 0.206 | 0.875 | 0.881 | 0.543 |
|                   | 0.033  | 0.007 | 0.003 | 0.667 | 0.744 | 0.744 | 0.705 |
| OCSVM+AutoEncoder | -0.023 | 0.000 | 0.000 | 0.000 | 0.881 | 0.885 | 0.442 |
|                   | 0.007  | 0.018 | 0.010 | 0.176 | 0.848 | 0.853 | 0.515 |
|                   | 0.000  | 0.000 | 0.000 | 0.000 | 0.999 | 1.000 | 0.500 |
| OCSVM+ECOD        | -0.023 | 0.000 | 0.000 | 0.000 | 0.881 | 0.885 | 0.442 |
|                   | -0.014 | 0.008 | 0.005 | 0.059 | 0.888 | 0.895 | 0.477 |
|                   | -0.002 | 0.000 | 0.000 | 0.000 | 0.994 | 0.995 | 0.498 |
| OCSVM+IForest     | -0.022 | 0.000 | 0.000 | 0.000 | 0.883 | 0.887 | 0.443 |
|                   | 0.008  | 0.018 | 0.010 | 0.176 | 0.848 | 0.853 | 0.515 |
|                   | 0.000  | 0.000 | 0.000 | 0.000 | 0.999 | 1.000 | 0.500 |
| OCSVM+KNN         | -0.022 | 0.000 | 0.000 | 0.000 | 0.885 | 0.889 | 0.444 |
|                   | 0.007  | 0.018 | 0.010 | 0.176 | 0.847 | 0.853 | 0.515 |
|                   | 0.000  | 0.000 | 0.000 | 0.000 | 0.999 | 1.000 | 0.500 |
| OCSVM+LUNAR       | -0.022 | 0.000 | 0.000 | 0.000 | 0.883 | 0.887 | 0.443 |
|                   | 0.007  | 0.018 | 0.010 | 0.176 | 0.847 | 0.853 | 0.515 |
|                   | 0.000  | 0.000 | 0.000 | 0.000 | 0.999 | 1.000 | 0.500 |
| OCSVM+OCSVM       | -0.023 | 0.000 | 0.000 | 0.000 | 0.881 | 0.885 | 0.442 |
|                   | 0.007  | 0.018 | 0.010 | 0.176 | 0.847 | 0.853 | 0.515 |
|                   | 0.040  | 0.011 | 0.005 | 0.444 | 0.896 | 0.897 | 0.671 |

**Table S4.** Evaluation metrics of the detection of all critical variants on the days they first appeared in three countries.

| country                                                                              |             | China  |        |        |        |        |        |        |        |         |        |        |        |        |        |         |
|--------------------------------------------------------------------------------------|-------------|--------|--------|--------|--------|--------|--------|--------|--------|---------|--------|--------|--------|--------|--------|---------|
| clade                                                                                |             | 21J    | 21K    | 22C    | 20J    | 20I    | 23A    | 20H    | 22D    | 22F     | 22B    | 22E    | 21A    | 21L    | 22A    | 21I     |
| date                                                                                 |             | 2021/4 | 2021/1 | 2022/5 | 2021/4 | 2021/1 | 2022/1 | 2020/1 | 2022/1 | 2022/9/ | 2022/5 | 2022/9 | 2020/8 | 2021/1 | 2022/6 | 2020/8/ |
|                                                                                      |             | /22    | 2/8    | /30    | /17    | /17    | 2/9    | 2/31   | /31    | 27      | /6     | /5     | /10    | 2/27   | /24    | 10      |
| Number of critical variants on the day they first appeared                           |             | 1      | 1      | 1      | 2      | 2      | 1      | 1      | 1      | 1       | 1      | 1      | 3      | 1      | 1      | 2       |
| Number of samples on the day the critical variants first appeared                    |             | 1      | 7      | 9      | 2      | 2      | 158    | 1      | 5      | 3       | 3      | 5      | 5      | 1      | 1      | 5       |
| Number of samples during 30 days before the day the critical variants first appeared |             | 97     | 255    | 608    | 95     | 33     | 1895   | 7      | 184    | 139     | 439    | 547    | 6      | 72     | 270    | 6       |
| KNN                                                                                  | MCC         | 0.000  | 0.471  | 0.000  | 0.000  | 0.000  | −0.038 | 0.000  | 0.408  | 0.000   | 0.000  | 1.000  | 0.000  | 0.000  | 0.000  | 0.000   |
|                                                                                      | F1_score    | 1.000  | 0.500  | 0.000  | 1.000  | 1.000  | 0.000  | 0.000  | 0.500  | 0.800   | 0.000  | 1.000  | 1.000  | 1.000  | 1.000  | 1.000   |
|                                                                                      | Precision   | 1.000  | 0.333  | 0.000  | 1.000  | 1.000  | 0.000  | 0.000  | 0.333  | 0.667   | 0.000  | 1.000  | 1.000  | 1.000  | 1.000  | 1.000   |
|                                                                                      | Recall      | 1.000  | 1.000  | 0.000  | 1.000  | 1.000  | 0.000  | 0.000  | 1.000  | 1.000   | 0.000  | 1.000  | 1.000  | 1.000  | 1.000  | 1.000   |
|                                                                                      | Accuracy    | 1.000  | 0.714  | 0.889  | 1.000  | 1.000  | 0.810  | 0.000  | 0.600  | 0.667   | 0.667  | 1.000  | 1.000  | 1.000  | 1.000  | 1.000   |
|                                                                                      | Specificity | 0.000  | 0.667  | 1.000  | 0.000  | 0.000  | 0.815  | 0.000  | 0.500  | 0.000   | 1.000  | 1.000  | 0.000  | 0.000  | 0.000  | 0.000   |
|                                                                                      | AUC         | /      | 0.833  | 0.500  | /      | /      | 0.408  | /      | 0.750  | 0.500   | 0.500  | 1.000  | /      | /      | /      | /       |
| LUNAR                                                                                | MCC         | 0.000  | 0.645  | 1.000  | 0.000  | 0.000  | −0.026 | 0.000  | 1.000  | 0.000   | 0.000  | 0.612  | 0.000  | 0.000  | 0.000  | 0.000   |
|                                                                                      | F1_score    | 1.000  | 0.667  | 1.000  | 1.000  | 1.000  | 0.000  | 1.000  | 1.000  | 0.800   | 0.000  | 0.667  | 1.000  | 1.000  | 1.000  | 1.000   |
|                                                                                      | Precision   | 1.000  | 0.500  | 1.000  | 1.000  | 1.000  | 0.000  | 1.000  | 1.000  | 0.667   | 0.000  | 0.500  | 1.000  | 1.000  | 1.000  | 1.000   |
|                                                                                      | Recall      | 1.000  | 1.000  | 1.000  | 1.000  | 1.000  | 0.000  | 1.000  | 1.000  | 1.000   | 0.000  | 1.000  | 1.000  | 1.000  | 1.000  | 1.000   |
|                                                                                      | Accuracy    | 1.000  | 0.857  | 1.000  | 1.000  | 1.000  | 0.899  | 1.000  | 1.000  | 0.667   | 0.667  | 0.800  | 1.000  | 1.000  | 1.000  | 1.000   |
|                                                                                      | Specificity | 0.000  | 0.833  | 1.000  | 0.000  | 0.000  | 0.904  | 0.000  | 1.000  | 0.000   | 1.000  | 0.750  | 0.000  | 0.000  | 0.000  | 0.000   |
|                                                                                      | AUC         | /      | 0.917  | 1.000  | /      | /      | 0.452  | /      | 1.000  | 0.500   | 0.500  | 0.875  | /      | /      | /      | /       |
| KNN+LUNAR                                                                            | MCC         | 0.000  | 0.471  | 0.000  | 0.000  | 0.000  | −0.038 | 0.000  | 0.408  | 0.000   | 0.000  | 1.000  | 0.000  | 0.000  | 0.000  | 0.000   |
|                                                                                      | F1_score    | 1.000  | 0.500  | 0.000  | 1.000  | 0.667  | 0.000  | 0.000  | 0.500  | 0.800   | 0.000  | 1.000  | 1.000  | 1.000  | 1.000  | 1.000   |
|                                                                                      | Precision   | 1.000  | 0.333  | 0.000  | 1.000  | 1.000  | 0.000  | 0.000  | 0.333  | 0.667   | 0.000  | 1.000  | 1.000  | 1.000  | 1.000  | 1.000   |
|                                                                                      | Recall      | 1.000  | 1.000  | 0.000  | 1.000  | 0.500  | 0.000  | 0.000  | 1.000  | 1.000   | 0.000  | 1.000  | 1.000  | 1.000  | 1.000  | 1.000   |
|                                                                                      | Accuracy    | 1.000  | 0.714  | 0.889  | 1.000  | 0.500  | 0.810  | 0.000  | 0.600  | 0.667   | 0.667  | 1.000  | 1.000  | 1.000  | 1.000  | 1.000   |
|                                                                                      | Specificity | 0.000  | 0.667  | 1.000  | 0.000  | 0.000  | 0.815  | 0.000  | 0.500  | 0.000   | 1.000  | 1.000  | 0.000  | 0.000  | 0.000  | 0.000   |
|                                                                                      | AUC         | /      | 0.833  | 0.500  | /      | /      | 0.408  | /      | 0.750  | 0.500   | 0.500  | 1.000  | /      | /      | /      | /       |
| KNN+KNN                                                                              | MCC         | 0.000  | 0.645  | 0.000  | 0.000  | 0.000  | −0.038 | 0.000  | 0.408  | 0.000   | 0.000  | 1.000  | 0.000  | 0.000  | 0.000  | 0.000   |

|             |             |       |       |       |       |       |        |       |       |       |       |       |       |       |       |       |
|-------------|-------------|-------|-------|-------|-------|-------|--------|-------|-------|-------|-------|-------|-------|-------|-------|-------|
| LUNAR+LUNAR | F1_score    | 0.000 | 0.667 | 0.000 | 1.000 | 0.667 | 0.000  | 0.000 | 0.500 | 0.800 | 0.000 | 1.000 | 0.571 | 1.000 | 1.000 | 0.571 |
|             | Precision   | 0.000 | 0.500 | 0.000 | 1.000 | 1.000 | 0.000  | 0.000 | 0.333 | 0.667 | 0.000 | 1.000 | 1.000 | 1.000 | 1.000 | 1.000 |
|             | Recall      | 0.000 | 1.000 | 0.000 | 1.000 | 0.500 | 0.000  | 0.000 | 1.000 | 1.000 | 0.000 | 1.000 | 0.400 | 1.000 | 1.000 | 0.400 |
|             | Accuracy    | 0.000 | 0.857 | 0.889 | 1.000 | 0.500 | 0.810  | 0.000 | 0.600 | 0.667 | 0.667 | 1.000 | 0.400 | 1.000 | 1.000 | 0.400 |
|             | Specificity | 0.000 | 0.833 | 1.000 | 0.000 | 0.000 | 0.815  | 0.000 | 0.500 | 0.000 | 1.000 | 1.000 | 0.000 | 0.000 | 0.000 | 0.000 |
|             | AUC         | /     | 0.917 | 0.500 | /     | /     | 0.408  | /     | 0.750 | 0.500 | 0.500 | 1.000 | /     | /     | /     | /     |
|             | MCC         | 0.000 | 0.645 | 0.000 | 0.000 | 0.000 | −0.023 | 0.000 | 1.000 | 0.000 | 0.500 | 0.612 | 0.000 | 0.000 | 0.000 | 0.000 |
|             | F1_score    | 1.000 | 0.667 | 0.000 | 1.000 | 0.667 | 0.000  | 1.000 | 1.000 | 0.800 | 0.667 | 0.667 | 1.000 | 1.000 | 1.000 | 1.000 |
|             | Precision   | 1.000 | 0.500 | 0.000 | 1.000 | 1.000 | 0.000  | 1.000 | 1.000 | 0.667 | 0.500 | 0.500 | 1.000 | 1.000 | 1.000 | 1.000 |
|             | Recall      | 1.000 | 1.000 | 0.000 | 1.000 | 0.500 | 0.000  | 1.000 | 1.000 | 1.000 | 1.000 | 1.000 | 1.000 | 1.000 | 1.000 | 1.000 |
|             | Accuracy    | 1.000 | 0.857 | 0.889 | 1.000 | 0.500 | 0.918  | 1.000 | 1.000 | 0.667 | 0.667 | 0.800 | 1.000 | 1.000 | 1.000 | 1.000 |
|             | Specificity | 0.000 | 0.833 | 1.000 | 0.000 | 0.000 | 0.924  | 0.000 | 1.000 | 0.000 | 0.500 | 0.750 | 0.000 | 0.000 | 0.000 | 0.000 |
| step1KNN    | AUC         | /     | 0.917 | 0.500 | /     | /     | 0.462  | /     | 1.000 | 0.500 | 0.750 | 0.875 | /     | /     | /     | /     |
|             | MCC         | 0.000 | 0.471 | 0.000 | 0.000 | 0.000 | −0.038 | 0.000 | 0.408 | 0.000 | 0.000 | 1.000 | 0.000 | 0.000 | 0.000 | 0.000 |
|             | F1_score    | 1.000 | 0.500 | 0.000 | 1.000 | 1.000 | 0.000  | 0.000 | 0.500 | 0.800 | 0.000 | 1.000 | 1.000 | 1.000 | 1.000 | 1.000 |
|             | Precision   | 1.000 | 0.333 | 0.000 | 1.000 | 1.000 | 0.000  | 0.000 | 0.333 | 0.667 | 0.000 | 1.000 | 1.000 | 1.000 | 1.000 | 1.000 |
|             | Recall      | 1.000 | 1.000 | 0.000 | 1.000 | 1.000 | 0.000  | 0.000 | 1.000 | 1.000 | 0.000 | 1.000 | 1.000 | 1.000 | 1.000 | 1.000 |
|             | Accuracy    | 1.000 | 0.714 | 0.889 | 1.000 | 1.000 | 0.810  | 0.000 | 0.600 | 0.667 | 0.667 | 1.000 | 1.000 | 1.000 | 1.000 | 1.000 |
|             | Specificity | 0.000 | 0.667 | 1.000 | 0.000 | 0.000 | 0.815  | 0.000 | 0.500 | 0.000 | 1.000 | 1.000 | 0.000 | 0.000 | 0.000 | 0.000 |
|             | AUC         | /     | 0.833 | 0.500 | /     | /     | 0.408  | /     | 0.750 | 0.500 | 0.500 | 1.000 | /     | /     | /     | /     |
|             | MCC         | 0.000 | 0.645 | 1.000 | 0.000 | 0.000 | 0.168  | 0.000 | 1.000 | 0.000 | 0.000 | 0.612 | 0.000 | 0.000 | 0.000 | 0.000 |
|             | F1_score    | 1.000 | 0.667 | 1.000 | 1.000 | 1.000 | 0.067  | 1.000 | 1.000 | 0.800 | 0.500 | 0.667 | 1.000 | 1.000 | 1.000 | 1.000 |
|             | Precision   | 1.000 | 0.500 | 1.000 | 1.000 | 1.000 | 0.034  | 1.000 | 1.000 | 0.667 | 0.333 | 0.500 | 1.000 | 1.000 | 1.000 | 1.000 |
|             | Recall      | 1.000 | 1.000 | 1.000 | 1.000 | 1.000 | 1.000  | 1.000 | 1.000 | 1.000 | 1.000 | 1.000 | 1.000 | 1.000 | 1.000 | 1.000 |
| step1LUNAR  | Accuracy    | 1.000 | 0.857 | 1.000 | 1.000 | 1.000 | 0.823  | 1.000 | 1.000 | 0.667 | 0.333 | 0.800 | 1.000 | 1.000 | 1.000 | 1.000 |
|             | Specificity | 0.000 | 0.833 | 1.000 | 0.000 | 0.000 | 0.822  | 0.000 | 1.000 | 0.000 | 0.000 | 0.750 | 0.000 | 0.000 | 0.000 | 0.000 |
|             | AUC         | /     | 0.917 | 1.000 | /     | /     | 0.911  | /     | 1.000 | 0.500 | 0.500 | 0.875 | /     | /     | /     | /     |

|                                                            |          |         |        |        |        |        |         |        |         |        |        |        |        |        |         |        |        |  |
|------------------------------------------------------------|----------|---------|--------|--------|--------|--------|---------|--------|---------|--------|--------|--------|--------|--------|---------|--------|--------|--|
| country                                                    | Portugal |         |        |        |        |        |         |        |         |        |        |        |        |        |         |        |        |  |
| clade                                                      | 22F      | 22C     | 22B    | 20I    | 20J    | 21L    | 22E     | 21I    | 21J     | 21A    | 22D    | 21K    | 23C    | 22A    | 23A     | 21M    | 20H    |  |
| date                                                       | 2022/1   | 2022/4/ | 2022/3 | 2020/1 | 2021/2 | 2022/1 | 2022/9/ | 2021/5 | 2021/4/ | 2021/4 | 2022/8 | 2021/2 | 2022/1 | 2022/5 | 2022/12 | 2022/3 | 2020/1 |  |
|                                                            | 0/8      | 25      | /29    | 1/9    | /9     | /2     | 7       | /6     | 21      | /18    | /14    | /2     | 0/21   | /16    | /5      | /7     | 2/26   |  |
| Number of critical variants on the day they first appeared | 1        | 1       | 1      | 1      | 1      | 1      | 1       | 1      | 1       | 1      | 1      | 1      | 1      | 1      | 1       | 1      | 1      |  |
| Number of samples on the day the critical variants first   | 40       | 174     | 156    | 55     | 164    | 146    | 6       | 106    | 9       | 21     | 26     | 8      | 54     | 181    | 60      | 214    | 72     |  |

| appeared                                                                             |             |       |       |       |        |       |        |        |        |       |       |        |       |        |        |        |        |        |
|--------------------------------------------------------------------------------------|-------------|-------|-------|-------|--------|-------|--------|--------|--------|-------|-------|--------|-------|--------|--------|--------|--------|--------|
| Number of samples during 30 days before the day the critical variants first appeared |             | 1195  | 2333  | 2533  | 29     | 1189  | 1950   | 1133   | 1850   | 1691  | 1641  | 1121   | 1118  | 833    | 2409   | 758    | 2118   | 200    |
| KNN                                                                                  | MCC         | 0.381 | 0.170 | 0.209 | -0.019 | 0.176 | -0.007 | -0.200 | -0.030 | 0.661 | 0.000 | -0.040 | 0.655 | -0.027 | 0.191  | -0.039 | 0.269  | -0.025 |
|                                                                                      | F1_score    | 0.286 | 0.067 | 0.095 | 0.000  | 0.071 | 0.000  | 0.000  | 0.000  | 0.667 | 0.000 | 0.000  | 0.667 | 0.000  | 0.080  | 0.000  | 0.143  | 0.000  |
|                                                                                      | Precision   | 0.167 | 0.034 | 0.050 | 0.000  | 0.037 | 0.000  | 0.000  | 0.000  | 0.500 | 0.000 | 0.000  | 0.500 | 0.000  | 0.042  | 0.000  | 0.077  | 0.000  |
|                                                                                      | Recall      | 1.000 | 1.000 | 1.000 | 0.000  | 1.000 | 0.000  | 0.000  | 0.000  | 1.000 | 0.000 | 0.000  | 1.000 | 0.000  | 1.000  | 0.000  | 1.000  | 0.000  |
|                                                                                      | Accuracy    | 0.875 | 0.839 | 0.878 | 0.964  | 0.841 | 0.986  | 0.667  | 0.906  | 0.889 | 0.952 | 0.923  | 0.875 | 0.944  | 0.873  | 0.900  | 0.944  | 0.944  |
|                                                                                      | Specificity | 0.872 | 0.838 | 0.877 | 0.981  | 0.840 | 0.993  | 0.800  | 0.914  | 0.875 | 1.000 | 0.960  | 0.857 | 0.962  | 0.872  | 0.915  | 0.944  | 0.958  |
|                                                                                      | AUC         | 0.936 | 0.919 | 0.939 | 0.491  | 0.920 | 0.497  | 0.400  | 0.457  | 0.938 | 0.500 | 0.480  | 0.929 | 0.481  | 0.936  | 0.458  | 0.972  | 0.479  |
| LUNAR                                                                                | MCC         | 0.348 | 0.181 | 0.216 | -0.019 | 0.169 | 0.705  | -0.200 | -0.033 | 0.661 | 0.689 | 1.000  | 0.655 | -0.039 | 0.098  | -0.039 | 0.259  | -0.025 |
|                                                                                      | F1_score    | 0.250 | 0.074 | 0.100 | 0.000  | 0.067 | 0.667  | 0.000  | 0.000  | 0.667 | 0.667 | 1.000  | 0.667 | 0.000  | 0.030  | 0.000  | 0.133  | 0.000  |
|                                                                                      | Precision   | 0.143 | 0.038 | 0.053 | 0.000  | 0.034 | 0.500  | 0.000  | 0.000  | 0.500 | 0.500 | 1.000  | 0.500 | 0.000  | 0.015  | 0.000  | 0.071  | 0.000  |
|                                                                                      | Recall      | 1.000 | 1.000 | 1.000 | 0.000  | 1.000 | 1.000  | 0.000  | 0.000  | 1.000 | 1.000 | 1.000  | 1.000 | 0.000  | 1.000  | 0.000  | 1.000  | 0.000  |
|                                                                                      | Accuracy    | 0.850 | 0.856 | 0.885 | 0.964  | 0.829 | 0.993  | 0.667  | 0.887  | 0.889 | 0.952 | 1.000  | 0.875 | 0.907  | 0.641  | 0.900  | 0.939  | 0.944  |
|                                                                                      | Specificity | 0.846 | 0.855 | 0.884 | 0.981  | 0.828 | 0.993  | 0.800  | 0.895  | 0.875 | 0.950 | 1.000  | 0.857 | 0.925  | 0.639  | 0.915  | 0.939  | 0.958  |
|                                                                                      | AUC         | 0.923 | 0.928 | 0.942 | 0.491  | 0.914 | 0.997  | 0.400  | 0.448  | 0.938 | 0.975 | 1.000  | 0.929 | 0.462  | 0.819  | 0.458  | 0.969  | 0.479  |
| KNN+LUNAR                                                                            | MCC         | 0.381 | 0.170 | 0.209 | -0.019 | 0.223 | -0.007 | -0.200 | -0.030 | 0.661 | 0.000 | -0.040 | 1.000 | -0.027 | 0.191  | -0.039 | 0.269  | -0.025 |
|                                                                                      | F1_score    | 0.286 | 0.067 | 0.095 | 0.000  | 0.105 | 0.000  | 0.000  | 0.000  | 0.667 | 0.000 | 0.000  | 1.000 | 0.000  | 0.080  | 0.000  | 0.143  | 0.000  |
|                                                                                      | Precision   | 0.167 | 0.034 | 0.050 | 0.000  | 0.056 | 0.000  | 0.000  | 0.000  | 0.500 | 0.000 | 0.000  | 1.000 | 0.000  | 0.042  | 0.000  | 0.077  | 0.000  |
|                                                                                      | Recall      | 1.000 | 1.000 | 1.000 | 0.000  | 1.000 | 0.000  | 0.000  | 0.000  | 1.000 | 0.000 | 0.000  | 1.000 | 0.000  | 1.000  | 0.000  | 1.000  | 0.000  |
|                                                                                      | Accuracy    | 0.875 | 0.839 | 0.878 | 0.964  | 0.896 | 0.986  | 0.667  | 0.906  | 0.889 | 0.952 | 0.923  | 1.000 | 0.944  | 0.873  | 0.900  | 0.944  | 0.944  |
|                                                                                      | Specificity | 0.872 | 0.838 | 0.877 | 0.981  | 0.896 | 0.993  | 0.800  | 0.914  | 0.875 | 1.000 | 0.960  | 1.000 | 0.962  | 0.872  | 0.915  | 0.944  | 0.958  |
|                                                                                      | AUC         | 0.936 | 0.919 | 0.939 | 0.491  | 0.948 | 0.497  | 0.400  | 0.457  | 0.938 | 0.500 | 0.480  | 1.000 | 0.481  | 0.936  | 0.458  | 0.972  | 0.479  |
| KNN+KNN                                                                              | MCC         | 0.381 | 0.174 | 0.209 | -0.019 | 0.247 | -0.007 | -0.200 | -0.030 | 0.661 | 0.000 | -0.040 | 1.000 | -0.027 | -0.026 | -0.039 | -0.015 | -0.025 |
|                                                                                      | F1_score    | 0.286 | 0.069 | 0.095 | 0.000  | 0.125 | 0.000  | 0.000  | 0.000  | 0.667 | 0.000 | 0.000  | 1.000 | 0.000  | 0.000  | 0.000  | 0.000  | 0.000  |
|                                                                                      | Precision   | 0.167 | 0.036 | 0.050 | 0.000  | 0.067 | 0.000  | 0.000  | 0.000  | 0.500 | 0.000 | 0.000  | 1.000 | 0.000  | 0.000  | 0.000  | 0.000  | 0.000  |
|                                                                                      | Recall      | 1.000 | 1.000 | 1.000 | 0.000  | 1.000 | 0.000  | 0.000  | 0.000  | 1.000 | 0.000 | 0.000  | 1.000 | 0.000  | 0.000  | 0.000  | 0.000  | 0.000  |
|                                                                                      | Accuracy    | 0.875 | 0.845 | 0.878 | 0.964  | 0.915 | 0.986  | 0.667  | 0.906  | 0.889 | 0.952 | 0.923  | 1.000 | 0.944  | 0.884  | 0.900  | 0.949  | 0.944  |
|                                                                                      | Specificity | 0.872 | 0.844 | 0.877 | 0.981  | 0.914 | 0.993  | 0.800  | 0.914  | 0.875 | 1.000 | 0.960  | 1.000 | 0.962  | 0.889  | 0.915  | 0.953  | 0.958  |
|                                                                                      | AUC         | 0.936 | 0.922 | 0.939 | 0.491  | 0.957 | 0.497  | 0.400  | 0.457  | 0.938 | 0.500 | 0.480  | 1.000 | 0.481  | 0.444  | 0.458  | 0.477  | 0.479  |
| LUNAR+LUNAR                                                                          | MCC         | 0.381 | 0.181 | 0.209 | -0.019 | 0.210 | 0.705  | -0.200 | -0.033 | 0.661 | 0.000 | 1.000  | 1.000 | -0.049 | 0.239  | -0.035 | 0.259  | -0.025 |
|                                                                                      | F1_score    | 0.286 | 0.074 | 0.095 | 0.000  | 0.095 | 0.667  | 0.000  | 0.000  | 0.667 | 0.000 | 1.000  | 1.000 | 0.000  | 0.118  | 0.000  | 0.133  | 0.000  |



|                                                                                      |             |           |        |        |        |        |        |         |        |        |        |        |        |         |        |         |        |        |
|--------------------------------------------------------------------------------------|-------------|-----------|--------|--------|--------|--------|--------|---------|--------|--------|--------|--------|--------|---------|--------|---------|--------|--------|
| step1KNN                                                                             | Precision   | 0.167     | 0.038  | 0.050  | 0.000  | 0.050  | 0.500  | 0.000   | 0.000  | 0.500  | 0.000  | 1.000  | 1.000  | 0.000   | 0.063  | 0.000   | 0.071  | 0.000  |
|                                                                                      | Recall      | 1.000     | 1.000  | 1.000  | 0.000  | 1.000  | 1.000  | 0.000   | 0.000  | 1.000  | 0.000  | 1.000  | 1.000  | 0.000   | 1.000  | 0.000   | 1.000  | 0.000  |
|                                                                                      | Accuracy    | 0.875     | 0.856  | 0.878  | 0.964  | 0.884  | 0.993  | 0.667   | 0.887  | 0.889  | 0.952  | 1.000  | 1.000  | 0.870   | 0.917  | 0.917   | 0.939  | 0.944  |
|                                                                                      | Specificity | 0.872     | 0.855  | 0.877  | 0.981  | 0.883  | 0.993  | 0.800   | 0.895  | 0.875  | 1.000  | 1.000  | 1.000  | 0.887   | 0.917  | 0.932   | 0.939  | 0.958  |
|                                                                                      | AUC         | 0.936     | 0.928  | 0.939  | 0.491  | 0.942  | 0.997  | 0.400   | 0.448  | 0.938  | 0.500  | 1.000  | 1.000  | 0.443   | 0.958  | 0.466   | 0.969  | 0.479  |
|                                                                                      | MCC         | 0.381     | 0.170  | 0.209  | −0.019 | 0.176  | −0.007 | −0.200  | −0.030 | 0.661  | 0.000  | −0.040 | 0.655  | −0.027  | 0.191  | −0.039  | 0.269  | −0.025 |
|                                                                                      | F1_score    | 0.286     | 0.067  | 0.095  | 0.000  | 0.071  | 0.000  | 0.000   | 0.000  | 0.667  | 0.000  | 0.000  | 0.667  | 0.000   | 0.080  | 0.000   | 0.143  | 0.000  |
|                                                                                      | Precision   | 0.167     | 0.034  | 0.050  | 0.000  | 0.037  | 0.000  | 0.000   | 0.000  | 0.500  | 0.000  | 0.000  | 0.500  | 0.000   | 0.042  | 0.000   | 0.077  | 0.000  |
|                                                                                      | Recall      | 1.000     | 1.000  | 1.000  | 0.000  | 1.000  | 0.000  | 0.000   | 0.000  | 1.000  | 0.000  | 0.000  | 1.000  | 0.000   | 1.000  | 0.000   | 1.000  | 0.000  |
|                                                                                      | Accuracy    | 0.875     | 0.839  | 0.878  | 0.964  | 0.841  | 0.986  | 0.667   | 0.906  | 0.889  | 0.952  | 0.923  | 0.875  | 0.944   | 0.873  | 0.900   | 0.944  | 0.944  |
|                                                                                      | Specificity | 0.872     | 0.838  | 0.877  | 0.981  | 0.840  | 0.993  | 0.800   | 0.914  | 0.875  | 1.000  | 0.960  | 0.857  | 0.962   | 0.872  | 0.915   | 0.944  | 0.958  |
|                                                                                      | AUC         | 0.936     | 0.919  | 0.939  | 0.491  | 0.920  | 0.497  | 0.400   | 0.457  | 0.938  | 0.500  | 0.480  | 0.929  | 0.481   | 0.936  | 0.458   | 0.972  | 0.479  |
|                                                                                      | MCC         | 0.381     | 0.186  | 0.204  | −0.019 | 0.176  | 0.705  | −0.200  | 0.155  | 0.661  | 0.000  | 1.000  | 0.655  | −0.039  | 0.224  | −0.039  | 0.250  | −0.025 |
|                                                                                      | F1_score    | 0.286     | 0.077  | 0.091  | 0.000  | 0.071  | 0.667  | 0.000   | 0.065  | 0.667  | 0.000  | 1.000  | 0.667  | 0.000   | 0.105  | 0.000   | 0.125  | 0.000  |
| step1LUNAR                                                                           | Precision   | 0.167     | 0.040  | 0.048  | 0.000  | 0.037  | 0.500  | 0.000   | 0.033  | 0.500  | 0.000  | 1.000  | 0.500  | 0.000   | 0.056  | 0.000   | 0.067  | 0.000  |
|                                                                                      | Recall      | 1.000     | 1.000  | 1.000  | 0.000  | 1.000  | 1.000  | 0.000   | 1.000  | 1.000  | 0.000  | 1.000  | 1.000  | 0.000   | 1.000  | 0.000   | 1.000  | 0.000  |
|                                                                                      | Accuracy    | 0.875     | 0.862  | 0.872  | 0.964  | 0.841  | 0.993  | 0.667   | 0.726  | 0.889  | 0.952  | 1.000  | 0.875  | 0.907   | 0.906  | 0.900   | 0.935  | 0.944  |
|                                                                                      | Specificity | 0.872     | 0.861  | 0.871  | 0.981  | 0.840  | 0.993  | 0.800   | 0.724  | 0.875  | 1.000  | 1.000  | 0.857  | 0.925   | 0.906  | 0.915   | 0.934  | 0.958  |
|                                                                                      | AUC         | 0.936     | 0.931  | 0.935  | 0.491  | 0.920  | 0.997  | 0.400   | 0.862  | 0.938  | 0.500  | 1.000  | 0.929  | 0.462   | 0.953  | 0.458   | 0.967  | 0.479  |
| country                                                                              |             | Argentina |        |        |        |        |        |         |        |        |        |        |        |         |        |         |        |        |
| clade                                                                                |             | 20H       | 20I    | 20J    | 21A    | 21I    | 21J    | 21K     | 21L    | 21M    | 22A    | 22B    | 22C    | 22D     | 22E    | 22F     | 23A    | 23C    |
| date                                                                                 |             | 2021/4    | 2020/1 | 2020/7 | 2021/4 | 2021/6 | 2020/1 | 2021/1/ | 2022/1 | 2021/1 | 2022/5 | 2022/5 | 2022/3 | 2022/1/ | 2022/5 | 2022/10 | 2022/1 | 2022/1 |
|                                                                                      |             | /24       | 2/21   | /22    | /24    | /4     | 1/9    | 6       | /18    | 2/21   | /9     | /21    | /16    | 2       | /22    | /12     | 2/6    | 2/5    |
| Number of critical variants on the day they first appeared                           |             | 1         | 1      | 1      | 1      | 1      | 1      | 1       | 1      | 4      | 1      | 1      | 1      | 1       | 1      | 1       | 1      | 2      |
| Number of samples on the day the critical variants first appeared                    |             | 18        | 15     | 13     | 18     | 31     | 4      | 11      | 54     | 133    | 9      | 7      | 8      | 27      | 5      | 3       | 44     | 65     |
| Number of samples during 30 days before the day the critical variants first appeared |             | 742       | 142    | 192    | 742    | 802    | 165    | 155     | 1924   | 1764   | 155    | 278    | 359    | 2071    | 279    | 110     | 309    | 246    |
| KNN                                                                                  | MCC         | 0.000     | −0.071 | 0.527  | 0.000  | −0.033 | 0.577  | 0.671   | 0.307  | 0.460  | −0.189 | −0.167 | 0.655  | 0.411   | 0.000  | 0.000   | −0.066 | −0.039 |
|                                                                                      | F1_score    | 0.000     | 0.000  | 0.500  | 0.000  | 0.000  | 0.667  | 0.667   | 0.200  | 0.381  | 0.000  | 0.000  | 0.667  | 0.333   | 0.000  | 0.000   | 0.000  | 0.000  |
|                                                                                      | Precision   | 0.000     | 0.000  | 0.333  | 0.000  | 0.000  | 0.500  | 0.500   | 0.111  | 0.235  | 0.000  | 0.000  | 0.500  | 0.200   | 0.000  | 0.000   | 0.000  | 0.000  |
|                                                                                      | Recall      | 0.000     | 0.000  | 1.000  | 0.000  | 0.000  | 1.000  | 1.000   | 1.000  | 1.000  | 0.000  | 0.000  | 1.000  | 1.000   | 0.000  | 0.000   | 0.000  | 0.000  |
|                                                                                      | Accuracy    | 0.889     | 0.867  | 0.846  | 0.889  | 0.935  | 0.750  | 0.909   | 0.852  | 0.902  | 0.667  | 0.714  | 0.875  | 0.852   | 0.800  | 0.667   | 0.818  | 0.923  |

|             |             |       |        |       |       |        |       |       |        |       |        |        |       |       |       |       |        |        |
|-------------|-------------|-------|--------|-------|-------|--------|-------|-------|--------|-------|--------|--------|-------|-------|-------|-------|--------|--------|
| LUNAR       | Specificity | 1.000 | 0.929  | 0.833 | 1.000 | 0.967  | 0.667 | 0.900 | 0.849  | 0.899 | 0.750  | 0.833  | 0.857 | 0.846 | 1.000 | 1.000 | 0.837  | 0.952  |
|             | AUC         | 0.500 | 0.464  | 0.917 | 0.500 | 0.483  | 0.833 | 0.950 | 0.925  | 0.950 | 0.375  | 0.417  | 0.929 | 0.923 | 0.500 | 0.500 | 0.419  | 0.476  |
|             | MCC         | 0.000 | -0.105 | 0.527 | 0.000 | 0.558  | 0.577 | 1.000 | 0.389  | 0.654 | -0.189 | 0.000  | 0.000 | 0.555 | 0.000 | 0.000 | -0.072 | -0.039 |
|             | F1_score    | 0.000 | 0.000  | 0.500 | 0.000 | 0.500  | 0.667 | 1.000 | 0.286  | 0.615 | 0.000  | 0.000  | 0.000 | 0.500 | 0.000 | 0.000 | 0.000  | 0.000  |
|             | Precision   | 0.000 | 0.000  | 0.333 | 0.000 | 0.333  | 0.500 | 1.000 | 0.167  | 0.444 | 0.000  | 0.000  | 0.000 | 0.333 | 0.000 | 0.000 | 0.000  | 0.000  |
|             | Recall      | 0.000 | 0.000  | 1.000 | 0.000 | 1.000  | 1.000 | 1.000 | 1.000  | 1.000 | 0.000  | 0.000  | 0.000 | 1.000 | 0.000 | 0.000 | 0.000  | 0.000  |
|             | Accuracy    | 0.889 | 0.800  | 0.846 | 0.889 | 0.935  | 0.750 | 1.000 | 0.907  | 0.962 | 0.667  | 0.857  | 0.875 | 0.926 | 0.800 | 0.667 | 0.795  | 0.923  |
|             | Specificity | 1.000 | 0.857  | 0.833 | 1.000 | 0.933  | 0.667 | 1.000 | 0.906  | 0.961 | 0.750  | 1.000  | 1.000 | 0.923 | 1.000 | 1.000 | 0.814  | 0.952  |
| KNN+LUNAR   | AUC         | 0.500 | 0.429  | 0.917 | 0.500 | 0.967  | 0.833 | 1.000 | 0.953  | 0.981 | 0.375  | 0.500  | 0.500 | 0.962 | 0.500 | 0.500 | 0.407  | 0.476  |
|             | MCC         | 0.000 | -0.071 | 0.527 | 0.000 | -0.033 | 0.577 | 0.671 | 0.307  | 0.476 | -0.189 | -0.167 | 0.655 | 0.411 | 0.000 | 0.000 | -0.066 | -0.039 |
|             | F1_score    | 0.000 | 0.000  | 0.500 | 0.000 | 0.000  | 0.667 | 0.667 | 0.200  | 0.400 | 0.000  | 0.000  | 0.667 | 0.333 | 0.000 | 0.000 | 0.000  | 0.000  |
|             | Precision   | 0.000 | 0.000  | 0.333 | 0.000 | 0.000  | 0.500 | 0.500 | 0.111  | 0.250 | 0.000  | 0.000  | 0.500 | 0.200 | 0.000 | 0.000 | 0.000  | 0.000  |
|             | Recall      | 0.000 | 0.000  | 1.000 | 0.000 | 0.000  | 1.000 | 1.000 | 1.000  | 1.000 | 0.000  | 0.000  | 1.000 | 1.000 | 0.000 | 0.000 | 0.000  | 0.000  |
|             | Accuracy    | 0.889 | 0.867  | 0.846 | 0.889 | 0.935  | 0.750 | 0.909 | 0.852  | 0.910 | 0.667  | 0.714  | 0.875 | 0.852 | 0.800 | 0.667 | 0.818  | 0.923  |
|             | Specificity | 1.000 | 0.929  | 0.833 | 1.000 | 0.967  | 0.667 | 0.900 | 0.849  | 0.907 | 0.750  | 0.833  | 0.857 | 0.846 | 1.000 | 1.000 | 0.837  | 0.952  |
|             | AUC         | 0.500 | 0.464  | 0.917 | 0.500 | 0.483  | 0.833 | 0.950 | 0.925  | 0.953 | 0.375  | 0.417  | 0.929 | 0.923 | 0.500 | 0.500 | 0.419  | 0.476  |
| KNN+KNN     | MCC         | 0.000 | -0.071 | 0.527 | 0.000 | -0.033 | 0.577 | 0.671 | -0.057 | 0.460 | -0.189 | -0.167 | 1.000 | 0.411 | 0.000 | 0.000 | -0.066 | -0.039 |
|             | F1_score    | 0.000 | 0.000  | 0.500 | 0.000 | 0.000  | 0.667 | 0.667 | 0.000  | 0.381 | 0.000  | 0.000  | 1.000 | 0.333 | 0.000 | 0.000 | 0.000  | 0.000  |
|             | Precision   | 0.000 | 0.000  | 0.333 | 0.000 | 0.000  | 0.500 | 0.500 | 0.000  | 0.235 | 0.000  | 0.000  | 1.000 | 0.200 | 0.000 | 0.000 | 0.000  | 0.000  |
|             | Recall      | 0.000 | 0.000  | 1.000 | 0.000 | 0.000  | 1.000 | 1.000 | 0.000  | 1.000 | 0.000  | 0.000  | 1.000 | 1.000 | 0.000 | 0.000 | 0.000  | 0.000  |
|             | Accuracy    | 0.889 | 0.867  | 0.846 | 0.889 | 0.935  | 0.750 | 0.909 | 0.833  | 0.902 | 0.667  | 0.714  | 1.000 | 0.852 | 0.800 | 0.667 | 0.818  | 0.923  |
|             | Specificity | 1.000 | 0.929  | 0.833 | 1.000 | 0.967  | 0.667 | 0.900 | 0.849  | 0.899 | 0.750  | 0.833  | 1.000 | 0.846 | 1.000 | 1.000 | 0.837  | 0.952  |
|             | AUC         | 0.500 | 0.464  | 0.917 | 0.500 | 0.483  | 0.833 | 0.950 | 0.425  | 0.950 | 0.375  | 0.417  | 1.000 | 0.923 | 0.500 | 0.500 | 0.419  | 0.476  |
|             | MCC         | 0.000 | -0.105 | 0.527 | 0.000 | 0.695  | 0.577 | 1.000 | 0.430  | 0.696 | -0.189 | 0.000  | 0.000 | 0.555 | 0.000 | 1.000 | -0.083 | -0.039 |
| LUNAR+LUNAR | F1_score    | 0.000 | 0.000  | 0.500 | 0.000 | 0.667  | 0.667 | 1.000 | 0.333  | 0.667 | 0.000  | 0.000  | 0.000 | 0.500 | 0.000 | 1.000 | 0.000  | 0.000  |
|             | Precision   | 0.000 | 0.000  | 0.333 | 0.000 | 0.500  | 0.500 | 1.000 | 0.200  | 0.500 | 0.000  | 0.000  | 0.000 | 0.333 | 0.000 | 1.000 | 0.000  | 0.000  |
|             | Recall      | 0.000 | 0.000  | 1.000 | 0.000 | 1.000  | 1.000 | 1.000 | 1.000  | 1.000 | 0.000  | 0.000  | 0.000 | 1.000 | 0.000 | 1.000 | 0.000  | 0.000  |
|             | Accuracy    | 0.889 | 0.800  | 0.846 | 0.889 | 0.968  | 0.750 | 1.000 | 0.926  | 0.970 | 0.667  | 0.857  | 0.875 | 0.926 | 0.800 | 1.000 | 0.750  | 0.923  |
|             | Specificity | 1.000 | 0.857  | 0.833 | 1.000 | 0.967  | 0.667 | 1.000 | 0.925  | 0.969 | 0.750  | 1.000  | 1.000 | 0.923 | 1.000 | 1.000 | 0.767  | 0.952  |
|             | AUC         | 0.500 | 0.429  | 0.917 | 0.500 | 0.983  | 0.833 | 1.000 | 0.962  | 0.984 | 0.375  | 0.500  | 0.500 | 0.962 | 0.500 | 1.000 | 0.384  | 0.476  |
|             | MCC         | 0.000 | -0.071 | 0.527 | 0.000 | -0.033 | 0.577 | 0.671 | 0.307  | 0.460 | -0.189 | -0.167 | 0.655 | 0.411 | 0.000 | 0.000 | -0.066 | -0.039 |
|             | F1_score    | 0.000 | 0.000  | 0.500 | 0.000 | 0.000  | 0.667 | 0.667 | 0.200  | 0.381 | 0.000  | 0.000  | 0.667 | 0.333 | 0.000 | 0.000 | 0.000  | 0.000  |
| step1KNN    | Precision   | 0.000 | 0.000  | 0.333 | 0.000 | 0.000  | 0.500 | 0.500 | 0.111  | 0.235 | 0.000  | 0.000  | 0.500 | 0.200 | 0.000 | 0.000 | 0.000  | 0.000  |

|            |             |       |        |       |       |        |       |       |       |       |        |        |       |       |       |       |        |        |
|------------|-------------|-------|--------|-------|-------|--------|-------|-------|-------|-------|--------|--------|-------|-------|-------|-------|--------|--------|
| step1LUNAR | Recall      | 0.000 | 0.000  | 1.000 | 0.000 | 0.000  | 1.000 | 1.000 | 1.000 | 1.000 | 0.000  | 0.000  | 1.000 | 1.000 | 0.000 | 0.000 | 0.000  | 0.000  |
|            | Accuracy    | 0.889 | 0.867  | 0.846 | 0.889 | 0.935  | 0.750 | 0.909 | 0.852 | 0.902 | 0.667  | 0.714  | 0.875 | 0.852 | 0.800 | 0.667 | 0.818  | 0.923  |
|            | Specificity | 1.000 | 0.929  | 0.833 | 1.000 | 0.967  | 0.667 | 0.900 | 0.849 | 0.899 | 0.750  | 0.833  | 0.857 | 0.846 | 1.000 | 1.000 | 0.837  | 0.952  |
|            | AUC         | 0.500 | 0.464  | 0.917 | 0.500 | 0.483  | 0.833 | 0.950 | 0.925 | 0.950 | 0.375  | 0.417  | 0.929 | 0.923 | 0.500 | 0.500 | 0.419  | 0.476  |
|            | MCC         | 0.686 | −0.105 | 0.527 | 0.000 | −0.033 | 0.577 | 0.671 | 0.389 | 0.654 | −0.189 | −0.167 | 0.655 | 0.555 | 0.000 | 0.000 | −0.072 | −0.046 |
|            | F1_score    | 0.667 | 0.000  | 0.500 | 0.000 | 0.000  | 0.667 | 0.667 | 0.286 | 0.615 | 0.000  | 0.000  | 0.667 | 0.500 | 0.000 | 0.000 | 0.000  | 0.000  |
|            | Precision   | 1.000 | 0.000  | 0.333 | 0.000 | 0.000  | 0.500 | 0.500 | 0.167 | 0.444 | 0.000  | 0.000  | 0.500 | 0.333 | 0.000 | 0.000 | 0.000  | 0.000  |
|            | Recall      | 0.500 | 0.000  | 1.000 | 0.000 | 0.000  | 1.000 | 1.000 | 1.000 | 1.000 | 0.000  | 0.000  | 1.000 | 1.000 | 0.000 | 0.000 | 0.000  | 0.000  |
|            | Accuracy    | 0.944 | 0.800  | 0.846 | 0.889 | 0.935  | 0.750 | 0.909 | 0.907 | 0.962 | 0.667  | 0.714  | 0.875 | 0.926 | 0.800 | 0.667 | 0.795  | 0.908  |
|            | Specificity | 1.000 | 0.857  | 0.833 | 1.000 | 0.967  | 0.667 | 0.900 | 0.906 | 0.961 | 0.750  | 0.833  | 0.857 | 0.923 | 1.000 | 1.000 | 0.814  | 0.937  |
|            | AUC         | 0.750 | 0.429  | 0.917 | 0.500 | 0.483  | 0.833 | 0.950 | 0.953 | 0.981 | 0.375  | 0.417  | 0.929 | 0.962 | 0.500 | 0.500 | 0.407  | 0.468  |

**Table S5.** Results of analog dynamic monitoring of new critical variant detection.

| country   | date       | Number of samples on the day | Number of samples during 30 days before the day | Real number of the new critical variants | KNN                                           |        |             | LUNAR                                         |        |             | KNN+LUNAR                                     |        |             | KNN+KNN                                       |        |             | LUNAR+LUNAR                                   |        |             |
|-----------|------------|------------------------------|-------------------------------------------------|------------------------------------------|-----------------------------------------------|--------|-------------|-----------------------------------------------|--------|-------------|-----------------------------------------------|--------|-------------|-----------------------------------------------|--------|-------------|-----------------------------------------------|--------|-------------|
|           |            |                              |                                                 |                                          | Predicted number of the new critical variants | Recall | Specificity | Predicted number of the new critical variants | Recall | Specificity | Predicted number of the new critical variants | Recall | Specificity | Predicted number of the new critical variants | Recall | Specificity | Predicted number of the new critical variants | Recall | Specificity |
| Argentina | 2021/10/1  | 18                           | 708                                             | 0                                        | 5                                             | /      | 0.722       | 7                                             | /      | 0.611       | 5                                             | /      | 0.722       | 5                                             | /      | 0.722       | 6                                             | /      | 0.667       |
|           | 2021/10/2  | 16                           | 675                                             | 0                                        | 3                                             | /      | 0.813       | 2                                             | /      | 0.875       | 4                                             | /      | 0.750       | 4                                             | /      | 0.750       | 2                                             | /      | 0.875       |
|           | 2021/10/3  | 5                            | 654                                             | 0                                        | 2                                             | /      | 0.600       | 1                                             | /      | 0.800       | 2                                             | /      | 0.600       | 2                                             | /      | 0.600       | 1                                             | /      | 0.800       |
|           | 2021/10/4  | 23                           | 621                                             | 0                                        | 5                                             | /      | 0.783       | 2                                             | /      | 0.913       | 4                                             | /      | 0.826       | 4                                             | /      | 0.826       | 2                                             | /      | 0.913       |
|           | 2021/10/5  | 19                           | 627                                             | 0                                        | 0                                             | /      | 1.000       | 1                                             | /      | 0.947       | 1                                             | /      | 0.947       | 1                                             | /      | 0.947       | 4                                             | /      | 0.789       |
|           | 2021/10/6  | 25                           | 621                                             | 0                                        | 3                                             | /      | 0.880       | 2                                             | /      | 0.920       | 3                                             | /      | 0.880       | 3                                             | /      | 0.880       | 2                                             | /      | 0.920       |
|           | 2021/10/7  | 31                           | 600                                             | 0                                        | 1                                             | /      | 0.968       | 2                                             | /      | 0.935       | 2                                             | /      | 0.935       | 2                                             | /      | 0.935       | 1                                             | /      | 0.968       |
|           | 2021/10/8  | 22                           | 593                                             | 1                                        | 3                                             | 0      | 0.857       | 1                                             | 0      | 0.952       | 2                                             | 0      | 0.905       | 2                                             | 0      | 0.905       | 1                                             | 0      | 0.952       |
|           | 2021/10/9  | 13                           | 595                                             | 0                                        | 0                                             | /      | 1.000       | 0                                             | /      | 1.000       | 1                                             | /      | 0.923       | 1                                             | /      | 0.923       | 0                                             | /      | 1.000       |
|           | 2021/10/10 | 20                           | 589                                             | 0                                        | 1                                             | /      | 0.950       | 0                                             | /      | 1.000       | 1                                             | /      | 0.950       | 1                                             | /      | 0.950       | 2                                             | /      | 0.900       |
|           | 2021/10/11 | 18                           | 590                                             | 0                                        | 1                                             | /      | 0.944       | 1                                             | /      | 0.944       | 1                                             | /      | 0.944       | 1                                             | /      | 0.944       | 1                                             | /      | 0.944       |
|           | 2021/10/12 | 55                           | 595                                             | 0                                        | 2                                             | /      | 0.964       | 2                                             | /      | 0.964       | 2                                             | /      | 0.964       | 2                                             | /      | 0.964       | 2                                             | /      | 0.964       |
|           | 2021/10/13 | 35                           | 638                                             | 0                                        | 2                                             | /      | 0.943       | 1                                             | /      | 0.971       | 1                                             | /      | 0.971       | 1                                             | /      | 0.971       | 1                                             | /      | 0.971       |
|           | 2021/10/14 | 51                           | 648                                             | 0                                        | 4                                             | /      | 0.922       | 4                                             | /      | 0.922       | 4                                             | /      | 0.922       | 4                                             | /      | 0.922       | 9                                             | /      | 0.824       |
|           | 2021/10/15 | 47                           | 674                                             | 0                                        | 4                                             | /      | 0.915       | 8                                             | /      | 0.830       | 4                                             | /      | 0.915       | 4                                             | /      | 0.915       | 3                                             | /      | 0.936       |
|           | 2021/10/16 | 31                           | 695                                             | 0                                        | 1                                             | /      | 0.968       | 1                                             | /      | 0.968       | 1                                             | /      | 0.968       | 1                                             | /      | 0.968       | 1                                             | /      | 0.968       |

|       |                |    |      |   |    |   |       |   |   |       |    |   |       |    |   |       |   |   |       |
|-------|----------------|----|------|---|----|---|-------|---|---|-------|----|---|-------|----|---|-------|---|---|-------|
|       | 2021/10/1<br>7 | 12 | 694  | 0 | 0  | / | 1.000 | 0 | / | 1.000 | 0  | / | 1.000 | 0  | / | 1.000 | 0 | / | 1.000 |
|       | 2021/10/1<br>8 | 60 | 683  | 0 | 2  | / | 0.967 | 2 | / | 0.967 | 1  | / | 0.983 | 1  | / | 0.983 | 2 | / | 0.967 |
|       | 2021/10/1<br>9 | 52 | 730  | 0 | 4  | / | 0.923 | 3 | / | 0.942 | 3  | / | 0.942 | 3  | / | 0.942 | 3 | / | 0.942 |
|       | 2021/10/2<br>0 | 53 | 773  | 0 | 4  | / | 0.925 | 3 | / | 0.943 | 2  | / | 0.962 | 3  | / | 0.943 | 2 | / | 0.962 |
|       | 2021/10/2<br>1 | 57 | 804  | 0 | 6  | / | 0.895 | 2 | / | 0.965 | 6  | / | 0.895 | 6  | / | 0.895 | 2 | / | 0.965 |
|       | 2021/10/2<br>2 | 58 | 836  | 0 | 10 | / | 0.828 | 4 | / | 0.931 | 4  | / | 0.931 | 4  | / | 0.931 | 5 | / | 0.914 |
|       | 2021/10/2<br>3 | 34 | 883  | 0 | 3  | / | 0.912 | 3 | / | 0.912 | 3  | / | 0.912 | 3  | / | 0.912 | 3 | / | 0.912 |
|       | 2021/10/2<br>4 | 24 | 881  | 0 | 2  | / | 0.917 | 1 | / | 0.958 | 3  | / | 0.875 | 3  | / | 0.875 | 1 | / | 0.958 |
|       | 2021/10/2<br>5 | 68 | 885  | 0 | 7  | / | 0.897 | 5 | / | 0.926 | 6  | / | 0.912 | 6  | / | 0.912 | 7 | / | 0.897 |
|       | 2021/10/2<br>6 | 80 | 936  | 0 | 6  | / | 0.925 | 4 | / | 0.950 | 6  | / | 0.925 | 6  | / | 0.925 | 4 | / | 0.950 |
|       | 2021/10/2<br>7 | 72 | 1005 | 1 | 3  | 1 | 0.972 | 3 | 1 | 0.972 | 5  | 1 | 0.944 | 4  | 1 | 0.958 | 3 | 1 | 0.972 |
|       | 2021/10/2<br>8 | 77 | 1057 | 0 | 9  | / | 0.883 | 4 | / | 0.948 | 7  | / | 0.909 | 7  | / | 0.909 | 5 | / | 0.935 |
|       | 2021/10/2<br>9 | 73 | 1115 | 0 | 10 | / | 0.863 | 8 | / | 0.890 | 15 | / | 0.795 | 11 | / | 0.849 | 8 | / | 0.890 |
|       | 2021/10/3<br>0 | 30 | 1169 | 0 | 2  | / | 0.933 | 3 | / | 0.900 | 3  | / | 0.900 | 3  | / | 0.900 | 1 | / | 0.967 |
|       | 2021/10/3<br>1 | 18 | 1179 | 0 | 0  | / | 1.000 | 0 | / | 1.000 | 0  | / | 1.000 | 0  | / | 1.000 | 0 | / | 1.000 |
| China | 2022/5/1       | 20 | 338  | 0 | 3  | / | 0.850 | 2 | / | 0.900 | 3  | / | 0.850 | 3  | / | 0.850 | 1 | / | 0.950 |
|       | 2022/5/2       | 21 | 358  | 0 | 4  | / | 0.810 | 2 | / | 0.905 | 6  | / | 0.714 | 6  | / | 0.714 | 4 | / | 0.810 |
|       | 2022/5/3       | 27 | 378  | 0 | 2  | / | 0.926 | 2 | / | 0.926 | 4  | / | 0.852 | 4  | / | 0.852 | 3 | / | 0.889 |

|          |           |    |      |   |   |   |       |   |   |       |   |   |       |   |   |       |   |   |       |
|----------|-----------|----|------|---|---|---|-------|---|---|-------|---|---|-------|---|---|-------|---|---|-------|
|          | 2022/5/4  | 26 | 401  | 0 | 2 | / | 0.923 | 2 | / | 0.923 | 2 | / | 0.923 | 2 | / | 0.923 | 4 | / | 0.846 |
|          | 2022/5/5  | 28 | 415  | 0 | 7 | / | 0.750 | 7 | / | 0.750 | 8 | / | 0.714 | 8 | / | 0.714 | 7 | / | 0.750 |
|          | 2022/5/6  | 3  | 439  | 1 | 0 | 0 | 1.000 | 0 | 0 | 1.000 | 0 | 0 | 1.000 | 0 | 0 | 1.000 | 0 | 0 | 1.000 |
|          | 2022/5/7  | 20 | 440  | 0 | 4 | / | 0.800 | 4 | / | 0.800 | 3 | / | 0.850 | 3 | / | 0.850 | 4 | / | 0.800 |
|          | 2022/5/8  | 28 | 448  | 0 | 0 | / | 1.000 | 1 | / | 0.964 | 1 | / | 0.964 | 1 | / | 0.964 | 1 | / | 0.964 |
|          | 2022/5/9  | 13 | 470  | 0 | 2 | / | 0.846 | 2 | / | 0.846 | 2 | / | 0.846 | 2 | / | 0.846 | 2 | / | 0.846 |
|          | 2022/5/10 | 14 | 477  | 0 | 3 | / | 0.786 | 3 | / | 0.786 | 3 | / | 0.786 | 3 | / | 0.786 | 3 | / | 0.786 |
|          | 2022/5/11 | 15 | 482  | 0 | 1 | / | 0.933 | 2 | / | 0.867 | 2 | / | 0.867 | 2 | / | 0.867 | 1 | / | 0.933 |
|          | 2022/5/12 | 31 | 489  | 0 | 2 | / | 0.935 | 2 | / | 0.935 | 2 | / | 0.935 | 2 | / | 0.935 | 2 | / | 0.935 |
|          | 2022/5/13 | 16 | 510  | 0 | 1 | / | 0.938 | 1 | / | 0.938 | 1 | / | 0.938 | 1 | / | 0.938 | 6 | / | 0.625 |
|          | 2022/5/14 | 19 | 523  | 0 | 1 | / | 0.947 | 1 | / | 0.947 | 1 | / | 0.947 | 1 | / | 0.947 | 1 | / | 0.947 |
|          | 2022/5/15 | 23 | 538  | 0 | 0 | / | 1.000 | 0 | / | 1.000 | 0 | / | 1.000 | 0 | / | 1.000 | 0 | / | 1.000 |
|          | 2022/5/16 | 26 | 559  | 0 | 0 | / | 1.000 | 0 | / | 1.000 | 0 | / | 1.000 | 0 | / | 1.000 | 0 | / | 1.000 |
|          | 2022/5/17 | 14 | 580  | 0 | 0 | / | 1.000 | 0 | / | 1.000 | 0 | / | 1.000 | 0 | / | 1.000 | 0 | / | 1.000 |
|          | 2022/5/18 | 24 | 591  | 0 | 0 | / | 1.000 | 0 | / | 1.000 | 0 | / | 1.000 | 0 | / | 1.000 | 0 | / | 1.000 |
|          | 2022/5/19 | 21 | 607  | 0 | 0 | / | 1.000 | 0 | / | 1.000 | 0 | / | 1.000 | 0 | / | 1.000 | 0 | / | 1.000 |
|          | 2022/5/20 | 31 | 622  | 0 | 0 | / | 1.000 | 0 | / | 1.000 | 0 | / | 1.000 | 0 | / | 1.000 | 0 | / | 1.000 |
|          | 2022/5/21 | 25 | 651  | 0 | 0 | / | 1.000 | 0 | / | 1.000 | 0 | / | 1.000 | 0 | / | 1.000 | 0 | / | 1.000 |
|          | 2022/5/22 | 32 | 676  | 0 | 0 | / | 1.000 | 0 | / | 1.000 | 0 | / | 1.000 | 0 | / | 1.000 | 0 | / | 1.000 |
|          | 2022/5/23 | 18 | 699  | 0 | 0 | / | 1.000 | 0 | / | 1.000 | 0 | / | 1.000 | 0 | / | 1.000 | 0 | / | 1.000 |
|          | 2022/5/24 | 17 | 691  | 0 | 0 | / | 1.000 | 0 | / | 1.000 | 0 | / | 1.000 | 0 | / | 1.000 | 0 | / | 1.000 |
|          | 2022/5/25 | 20 | 691  | 0 | 0 | / | 1.000 | 0 | / | 1.000 | 0 | / | 1.000 | 0 | / | 1.000 | 1 | / | 0.950 |
|          | 2022/5/26 | 17 | 693  | 0 | 0 | / | 1.000 | 0 | / | 1.000 | 0 | / | 1.000 | 0 | / | 1.000 | 0 | / | 1.000 |
|          | 2022/5/27 | 12 | 672  | 0 | 0 | / | 1.000 | 0 | / | 1.000 | 0 | / | 1.000 | 0 | / | 1.000 | 0 | / | 1.000 |
|          | 2022/5/28 | 11 | 658  | 0 | 0 | / | 1.000 | 0 | / | 1.000 | 0 | / | 1.000 | 0 | / | 1.000 | 4 | / | 0.636 |
|          | 2022/5/29 | 7  | 638  | 0 | 0 | / | 1.000 | 0 | / | 1.000 | 0 | / | 1.000 | 0 | / | 1.000 | 0 | / | 1.000 |
|          | 2022/5/30 | 9  | 608  | 1 | 0 | 0 | 1.000 | 1 | 1 | 1.000 | 0 | 0 | 1.000 | 0 | 0 | 1.000 | 0 | 0 | 1.000 |
|          | 2022/5/31 | 19 | 588  | 0 | 0 | / | 1.000 | 2 | / | 0.895 | 0 | / | 1.000 | 0 | / | 1.000 | 1 | / | 0.947 |
| Portugal | 2021/4/1  | 12 | 1010 | 0 | 5 | / | 0.583 | 4 | / | 0.667 | 5 | / | 0.583 | 5 | / | 0.583 | 5 | / | 0.583 |
|          | 2021/4/2  | 8  | 911  | 0 | 1 | / | 0.875 | 5 | / | 0.375 | 1 | / | 0.875 | 1 | / | 0.875 | 1 | / | 0.875 |
|          | 2021/4/3  | 5  | 798  | 0 | 0 | / | 1.000 | 0 | / | 1.000 | 0 | / | 1.000 | 0 | / | 1.000 | 0 | / | 1.000 |
|          | 2021/4/4  | 8  | 710  | 0 | 1 | / | 0.875 | 1 | / | 0.875 | 1 | / | 0.875 | 1 | / | 0.875 | 1 | / | 0.875 |

|  |           |     |      |   |    |   |       |    |   |       |    |   |       |    |   |       |    |   |       |
|--|-----------|-----|------|---|----|---|-------|----|---|-------|----|---|-------|----|---|-------|----|---|-------|
|  | 2021/4/5  | 233 | 616  | 0 | 51 | / | 0.781 | 44 | / | 0.811 | 51 | / | 0.781 | 51 | / | 0.781 | 45 | / | 0.807 |
|  | 2021/4/6  | 196 | 790  | 0 | 12 | / | 0.939 | 10 | / | 0.949 | 13 | / | 0.934 | 13 | / | 0.934 | 10 | / | 0.949 |
|  | 2021/4/7  | 166 | 942  | 0 | 36 | / | 0.783 | 30 | / | 0.819 | 38 | / | 0.771 | 38 | / | 0.771 | 34 | / | 0.795 |
|  | 2021/4/8  | 189 | 1023 | 0 | 8  | / | 0.958 | 6  | / | 0.968 | 7  | / | 0.963 | 7  | / | 0.963 | 6  | / | 0.968 |
|  | 2021/4/9  | 200 | 1154 | 0 | 12 | / | 0.940 | 8  | / | 0.960 | 13 | / | 0.935 | 13 | / | 0.935 | 10 | / | 0.950 |
|  | 2021/4/10 | 126 | 1277 | 0 | 7  | / | 0.944 | 8  | / | 0.937 | 10 | / | 0.921 | 10 | / | 0.921 | 6  | / | 0.952 |
|  | 2021/4/11 | 50  | 1331 | 0 | 1  | / | 0.980 | 1  | / | 0.980 | 1  | / | 0.980 | 1  | / | 0.980 | 1  | / | 0.980 |
|  | 2021/4/12 | 78  | 1335 | 0 | 5  | / | 0.936 | 6  | / | 0.923 | 5  | / | 0.936 | 5  | / | 0.936 | 6  | / | 0.923 |
|  | 2021/4/13 | 80  | 1364 | 0 | 5  | / | 0.938 | 4  | / | 0.950 | 5  | / | 0.938 | 5  | / | 0.938 | 5  | / | 0.938 |
|  | 2021/4/14 | 63  | 1419 | 0 | 6  | / | 0.905 | 5  | / | 0.921 | 6  | / | 0.905 | 6  | / | 0.905 | 5  | / | 0.921 |
|  | 2021/4/15 | 82  | 1469 | 0 | 4  | / | 0.951 | 3  | / | 0.963 | 3  | / | 0.963 | 3  | / | 0.963 | 3  | / | 0.963 |
|  | 2021/4/16 | 60  | 1547 | 0 | 7  | / | 0.883 | 8  | / | 0.867 | 8  | / | 0.867 | 8  | / | 0.867 | 8  | / | 0.867 |
|  | 2021/4/17 | 42  | 1600 | 0 | 0  | / | 1.000 | 3  | / | 0.929 | 0  | / | 1.000 | 0  | / | 1.000 | 0  | / | 1.000 |
|  | 2021/4/18 | 21  | 1641 | 1 | 0  | 0 | 1.000 | 0  | 0 | 1.000 | 0  | 0 | 1.000 | 0  | 0 | 1.000 | 0  | 0 | 1.000 |
|  | 2021/4/19 | 30  | 1657 | 0 | 3  | / | 0.900 | 3  | / | 0.900 | 3  | / | 0.900 | 3  | / | 0.900 | 3  | / | 0.900 |
|  | 2021/4/20 | 5   | 1686 | 0 | 1  | / | 0.800 | 1  | / | 0.800 | 1  | / | 0.800 | 1  | / | 0.800 | 1  | / | 0.800 |
|  | 2021/4/21 | 9   | 1691 | 1 | 2  | 1 | 0.875 | 2  | 1 | 0.875 | 2  | 1 | 0.875 | 2  | 1 | 0.875 | 2  | 1 | 0.875 |
|  | 2021/4/22 | 2   | 1697 | 0 | 0  | / | 1.000 | 0  | / | 1.000 | 0  | / | 1.000 | 0  | / | 1.000 | 0  | / | 1.000 |
|  | 2021/4/23 | 1   | 1696 | 0 | 0  | / | 1.000 | 1  | / | 0.000 | 0  | / | 1.000 | 0  | / | 1.000 | 0  | / | 1.000 |
|  | 2021/4/24 | 6   | 1696 | 0 | 0  | / | 1.000 | 0  | / | 1.000 | 0  | / | 1.000 | 0  | / | 1.000 | 0  | / | 1.000 |
|  | 2021/4/25 | 1   | 1696 | 0 | 1  | / | 0.000 | 1  | / | 0.000 | 1  | / | 0.000 | 1  | / | 0.000 | 1  | / | 0.000 |
|  | 2021/4/26 | 4   | 1692 | 0 | 2  | / | 0.500 | 1  | / | 0.750 | 2  | / | 0.500 | 2  | / | 0.500 | 1  | / | 0.750 |
|  | 2021/4/27 | 11  | 1695 | 0 | 0  | / | 1.000 | 1  | / | 0.909 | 1  | / | 0.909 | 1  | / | 0.909 | 0  | / | 1.000 |
|  | 2021/4/28 | 3   | 1705 | 0 | 1  | / | 0.667 | 1  | / | 0.667 | 1  | / | 0.667 | 1  | / | 0.667 | 1  | / | 0.667 |
|  | 2021/4/29 | 1   | 1704 | 0 | 1  | / | 0.000 | 1  | / | 0.000 | 1  | / | 0.000 | 1  | / | 0.000 | 1  | / | 0.000 |
|  | 2021/4/30 | 8   | 1697 | 0 | 0  | / | 1.000 | 0  | / | 1.000 | 0  | / | 1.000 | 0  | / | 1.000 | 0  | / | 1.000 |

## Part 2

Considering that VOI has now been largely proven to be benign, the text only considers VOC as the critical variant. In the supplementary data below (Tables S6–S9, Figures S1–S4), we provided the results of the text method test when both VOC and VOI were considered as critical variant.

When we considered VOC/VOI as a critical variant, the five better models obtained by testing on our data in the step of new critical variant detection are KNN, LUNAR, KNN+LUNAR, LUNAR+KNN and KNN+KNN. The recall rates of these five models are above 0.5 and the AUC scores are above 0.7. Therefore, we used these five better performing models in our subsequent evaluation. Combined with the rounds of evaluation, LUNAR was the most prominent model of all the tested models. This result is consistent with the results in the text that only consider VOC as a critical variant.

**Table S6.** Evaluation of new variant detection (consider VOC/VOI as critical variants).

| Model            | MCC    | F1_score | Precision | Recall | Accuracy | Specificity | AUC   |
|------------------|--------|----------|-----------|--------|----------|-------------|-------|
| AutoEncoder [34] | −0.016 | 0.004    | 0.002     | 0.078  | 0.838    | 0.842       | 0.460 |
| ECOD [30]        | −0.005 | 0.008    | 0.004     | 0.078  | 0.887    | 0.891       | 0.485 |
| IForest [33]     | −0.004 | 0.009    | 0.005     | 0.088  | 0.883    | 0.886       | 0.487 |
| KNN [32]         | 0.092  | 0.035    | 0.018     | 0.741  | 0.793    | 0.792       | 0.767 |
| LUNAR [35]       | 0.117  | 0.051    | 0.027     | 0.852  | 0.775    | 0.774       | 0.813 |
| OCSVM [31]       | 0.006  | 0.010    | 0.005     | 0.207  | 0.874    | 0.878       | 0.543 |

**Table S7.** Evaluation of critical variant detection (consider VOC/VOI as critical variants).

| Model            | MCC   | F1_score | Precision | Recall | Accuracy | Specificity | AUC   |
|------------------|-------|----------|-----------|--------|----------|-------------|-------|
| AutoEncoder [34] | 0.643 | 0.799    | 0.881     | 0.732  | 0.817    | 0.901       | 0.817 |
| ECOD [30]        | 0.350 | 0.533    | 0.806     | 0.399  | 0.651    | 0.903       | 0.651 |
| IForest [33]     | 0.332 | 0.509    | 0.796     | 0.380  | 0.642    | 0.904       | 0.642 |
| KNN [32]         | 0.247 | 0.424    | 0.747     | 0.297  | 0.599    | 0.900       | 0.599 |
| LUNAR [35]       | 0.655 | 0.801    | 0.900     | 0.721  | 0.821    | 0.920       | 0.821 |
| OCSVM [31]       | 0.039 | 0.195    | 0.559     | 0.119  | 0.512    | 0.905       | 0.512 |



**Table S8.** Evaluation of new critical variant detection (consider VOC/VOI as critical variants).

| Model                   | MCC    | F1_score | Precision | Recall | Accuracy | Specificity | AUC   |
|-------------------------|--------|----------|-----------|--------|----------|-------------|-------|
| AutoEncoder [34]        | -0.014 | 0.004    | 0.002     | 0.078  | 0.839    | 0.842       | 0.460 |
| ECOD [30]               | -0.003 | 0.008    | 0.004     | 0.078  | 0.888    | 0.891       | 0.485 |
| IForest [33]            | -0.003 | 0.008    | 0.004     | 0.098  | 0.869    | 0.872       | 0.485 |
| KNN [32]                | 0.105  | 0.035    | 0.018     | 0.852  | 0.794    | 0.793       | 0.822 |
| LUNAR [35]              | 0.102  | 0.045    | 0.023     | 0.722  | 0.812    | 0.812       | 0.767 |
| OCSVM [31]              | 0.008  | 0.010    | 0.005     | 0.207  | 0.875    | 0.878       | 0.543 |
| AutoEncoder+AutoEncoder | -0.011 | 0.004    | 0.002     | 0.078  | 0.860    | 0.862       | 0.470 |
| AutoEncoder+ECOD        | -0.007 | 0.006    | 0.003     | 0.039  | 0.919    | 0.923       | 0.481 |
| AutoEncoder+IForest     | -0.010 | 0.004    | 0.002     | 0.078  | 0.866    | 0.869       | 0.474 |
| AutoEncoder+KNN         | -0.011 | 0.004    | 0.002     | 0.078  | 0.863    | 0.866       | 0.472 |
| AutoEncoder+LUNAR       | -0.011 | 0.004    | 0.002     | 0.078  | 0.861    | 0.864       | 0.471 |
| AutoEncoder+OCSVM       | -0.008 | 0.006    | 0.003     | 0.078  | 0.872    | 0.875       | 0.477 |
| ECOD+AutoEncoder        | 0.000  | 0.008    | 0.004     | 0.078  | 0.907    | 0.910       | 0.494 |
| ECOD+ECOD               | -0.005 | 0.007    | 0.004     | 0.049  | 0.919    | 0.923       | 0.486 |
| ECOD+IForest            | 0.000  | 0.008    | 0.004     | 0.078  | 0.908    | 0.911       | 0.495 |
| ECOD+KNN                | 0.000  | 0.008    | 0.004     | 0.078  | 0.908    | 0.911       | 0.495 |
| ECOD+LUNAR              | 0.000  | 0.008    | 0.004     | 0.078  | 0.907    | 0.910       | 0.494 |
| ECOD+OCSVM              | -0.003 | 0.008    | 0.004     | 0.078  | 0.894    | 0.897       | 0.488 |
| IForest+AutoEncoder     | -0.004 | 0.007    | 0.003     | 0.078  | 0.894    | 0.897       | 0.488 |
| IForest+ECOD            | -0.007 | 0.006    | 0.003     | 0.039  | 0.919    | 0.923       | 0.481 |
| IForest+IForest         | -0.002 | 0.007    | 0.004     | 0.078  | 0.902    | 0.905       | 0.492 |
| IForest+KNN             | 0.010  | 0.012    | 0.006     | 0.127  | 0.902    | 0.905       | 0.516 |
| IForest+LUNAR           | 0.024  | 0.015    | 0.008     | 0.225  | 0.899    | 0.901       | 0.563 |
| IForest+OCSVM           | -0.009 | 0.005    | 0.003     | 0.088  | 0.858    | 0.861       | 0.475 |
| KNN+AutoEncoder         | 0.027  | 0.014    | 0.007     | 0.294  | 0.849    | 0.850       | 0.572 |
| KNN+ECOD                | -0.008 | 0.005    | 0.003     | 0.039  | 0.916    | 0.920       | 0.479 |
| KNN+IForest             | 0.050  | 0.022    | 0.011     | 0.412  | 0.851    | 0.852       | 0.632 |
| KNN+KNN                 | 0.092  | 0.033    | 0.017     | 0.667  | 0.843    | 0.842       | 0.754 |
| KNN+LUNAR               | 0.090  | 0.033    | 0.017     | 0.685  | 0.825    | 0.825       | 0.755 |
| KNN+OCSVM               | 0.014  | 0.010    | 0.005     | 0.322  | 0.813    | 0.815       | 0.569 |
| LUNAR+AutoEncoder       | 0.016  | 0.010    | 0.005     | 0.294  | 0.797    | 0.798       | 0.546 |
| LUNAR+ECOD              | -0.005 | 0.007    | 0.004     | 0.049  | 0.913    | 0.917       | 0.483 |
| LUNAR+IForest           | 0.021  | 0.016    | 0.008     | 0.176  | 0.902    | 0.904       | 0.540 |
| LUNAR+KNN               | 0.095  | 0.044    | 0.023     | 0.500  | 0.908    | 0.908       | 0.704 |
| LUNAR+LUNAR             | 0.079  | 0.034    | 0.018     | 0.500  | 0.879    | 0.879       | 0.690 |
| LUNAR+OCSVM             | 0.033  | 0.019    | 0.010     | 0.434  | 0.808    | 0.810       | 0.622 |
| OCSVM+AutoEncoder       | -0.005 | 0.006    | 0.003     | 0.059  | 0.909    | 0.913       | 0.486 |
| OCSVM+ECOD              | -0.005 | 0.007    | 0.004     | 0.049  | 0.919    | 0.923       | 0.486 |
| OCSVM+IForest           | -0.005 | 0.006    | 0.003     | 0.059  | 0.909    | 0.913       | 0.486 |
| OCSVM+KNN               | -0.005 | 0.006    | 0.003     | 0.059  | 0.911    | 0.914       | 0.486 |
| OCSVM+LUNAR             | -0.006 | 0.006    | 0.003     | 0.059  | 0.908    | 0.911       | 0.485 |

|             |       |       |       |       |       |       |       |
|-------------|-------|-------|-------|-------|-------|-------|-------|
| OCSVM+OCSVM | 0.008 | 0.010 | 0.005 | 0.207 | 0.877 | 0.880 | 0.544 |
|-------------|-------|-------|-------|-------|-------|-------|-------|

**Table S9.** Results of analog dynamic monitoring of new critical variant detection (consider VOC/VOI as critical variants).

| country   | date       | Number of samples on the day | Number of samples during 30 days before the day | Real number of the new critical variants | KNN                                           |        |             | LUNAR                                         |        |             | KNN+LUNAR                                     |        |             | KNN+KNN                                       |        |             | LUNAR+KNN                                     |        |             |
|-----------|------------|------------------------------|-------------------------------------------------|------------------------------------------|-----------------------------------------------|--------|-------------|-----------------------------------------------|--------|-------------|-----------------------------------------------|--------|-------------|-----------------------------------------------|--------|-------------|-----------------------------------------------|--------|-------------|
|           |            |                              |                                                 |                                          | Predicted number of the new critical variants | Recall | Specificity | Predicted number of the new critical variants | Recall | Specificity | Predicted number of the new critical variants | Recall | Specificity | Predicted number of the new critical variants | Recall | Specificity | Predicted number of the new critical variants | Recall | Specificity |
| Argentina | 2021/10/1  | 18                           | 708                                             | 0                                        | 5                                             | /      | 0.722       | 5                                             | /      | 0.722       | 5                                             | /      | 0.722       | 5                                             | /      | 0.722       | 6                                             | /      | 0.667       |
|           | 2021/10/2  | 16                           | 675                                             | 0                                        | 3                                             | /      | 0.813       | 1                                             | /      | 0.938       | 4                                             | /      | 0.750       | 4                                             | /      | 0.750       | 2                                             | /      | 0.875       |
|           | 2021/10/3  | 5                            | 654                                             | 0                                        | 2                                             | /      | 0.600       | 3                                             | /      | 0.400       | 2                                             | /      | 0.600       | 2                                             | /      | 0.600       | 2                                             | /      | 0.600       |
|           | 2021/10/4  | 23                           | 621                                             | 1                                        | 5                                             | 1      | 0.818       | 2                                             | 1      | 0.955       | 4                                             | 1      | 0.864       | 4                                             | 1      | 0.864       | 3                                             | 1      | 0.909       |
|           | 2021/10/5  | 19                           | 627                                             | 0                                        | 0                                             | /      | 1.000       | 3                                             | /      | 0.842       | 1                                             | /      | 0.947       | 1                                             | /      | 0.947       | 1                                             | /      | 0.947       |
|           | 2021/10/6  | 25                           | 621                                             | 0                                        | 3                                             | /      | 0.880       | 3                                             | /      | 0.880       | 3                                             | /      | 0.880       | 3                                             | /      | 0.880       | 3                                             | /      | 0.880       |
|           | 2021/10/7  | 31                           | 600                                             | 0                                        | 1                                             | /      | 0.968       | 1                                             | /      | 0.968       | 2                                             | /      | 0.935       | 2                                             | /      | 0.935       | 1                                             | /      | 0.968       |
|           | 2021/10/8  | 22                           | 593                                             | 1                                        | 3                                             | 0      | 0.857       | 2                                             | 0      | 0.905       | 2                                             | 0      | 0.905       | 2                                             | 0      | 0.905       | 1                                             | 0      | 0.952       |
|           | 2021/10/9  | 13                           | 595                                             | 0                                        | 0                                             | /      | 1.000       | 0                                             | /      | 1.000       | 1                                             | /      | 0.923       | 1                                             | /      | 0.923       | 0                                             | /      | 1.000       |
|           | 2021/10/10 | 20                           | 589                                             | 0                                        | 1                                             | /      | 0.950       | 9                                             | /      | 0.550       | 1                                             | /      | 0.950       | 1                                             | /      | 0.950       | 0                                             | /      | 1.000       |
|           | 2021/10/11 | 18                           | 590                                             | 0                                        | 1                                             | /      | 0.944       | 5                                             | /      | 0.722       | 1                                             | /      | 0.944       | 1                                             | /      | 0.944       | 1                                             | /      | 0.944       |
|           | 2021/10/12 | 55                           | 595                                             | 0                                        | 2                                             | /      | 0.964       | 2                                             | /      | 0.964       | 2                                             | /      | 0.964       | 2                                             | /      | 0.964       | 2                                             | /      | 0.964       |
|           | 2021/10/13 | 35                           | 638                                             | 0                                        | 2                                             | /      | 0.943       | 1                                             | /      | 0.971       | 1                                             | /      | 0.971       | 1                                             | /      | 0.971       | 1                                             | /      | 0.971       |
|           | 2021/10/14 | 51                           | 648                                             | 0                                        | 4                                             | /      | 0.922       | 3                                             | /      | 0.941       | 4                                             | /      | 0.922       | 4                                             | /      | 0.922       | 3                                             | /      | 0.941       |
|           | 2021/10/15 | 47                           | 674                                             | 0                                        | 4                                             | /      | 0.915       | 3                                             | /      | 0.936       | 4                                             | /      | 0.915       | 4                                             | /      | 0.915       | 3                                             | /      | 0.936       |
|           | 2021/10/16 | 31                           | 695                                             | 0                                        | 1                                             | /      | 0.968       | 1                                             | /      | 0.968       | 1                                             | /      | 0.968       | 1                                             | /      | 0.968       | 2                                             | /      | 0.935       |
|           | 2021/10/17 | 12                           | 694                                             | 0                                        | 0                                             | /      | 1.000       | 0                                             | /      | 1.000       | 0                                             | /      | 1.000       | 0                                             | /      | 1.000       | 0                                             | /      | 1.000       |

|       |            |    |      |   |    |   |       |    |   |       |    |   |       |    |   |       |   |   |       |
|-------|------------|----|------|---|----|---|-------|----|---|-------|----|---|-------|----|---|-------|---|---|-------|
|       | 7          |    |      |   |    |   |       |    |   |       |    |   |       |    |   |       |   |   |       |
|       | 2021/10/18 | 60 | 683  | 0 | 2  | / | 0.967 | 51 | / | 0.150 | 1  | / | 0.983 | 1  | / | 0.983 | 2 | / | 0.967 |
|       | 2021/10/19 | 52 | 730  | 0 | 4  | / | 0.923 | 3  | / | 0.942 | 3  | / | 0.942 | 3  | / | 0.942 | 3 | / | 0.942 |
|       | 2021/10/20 | 53 | 773  | 0 | 4  | / | 0.925 | 2  | / | 0.962 | 4  | / | 0.925 | 4  | / | 0.925 | 3 | / | 0.943 |
|       | 2021/10/21 | 57 | 804  | 0 | 6  | / | 0.895 | 2  | / | 0.965 | 6  | / | 0.895 | 6  | / | 0.895 | 2 | / | 0.965 |
|       | 2021/10/22 | 58 | 836  | 0 | 10 | / | 0.828 | 6  | / | 0.897 | 4  | / | 0.931 | 4  | / | 0.931 | 6 | / | 0.897 |
|       | 2021/10/23 | 34 | 883  | 0 | 3  | / | 0.912 | 4  | / | 0.882 | 3  | / | 0.912 | 3  | / | 0.912 | 3 | / | 0.912 |
|       | 2021/10/24 | 24 | 881  | 0 | 2  | / | 0.917 | 3  | / | 0.875 | 3  | / | 0.875 | 3  | / | 0.875 | 2 | / | 0.917 |
|       | 2021/10/25 | 68 | 885  | 0 | 7  | / | 0.897 | 7  | / | 0.897 | 6  | / | 0.912 | 6  | / | 0.912 | 5 | / | 0.926 |
|       | 2021/10/26 | 80 | 936  | 0 | 6  | / | 0.925 | 5  | / | 0.938 | 6  | / | 0.925 | 6  | / | 0.925 | 3 | / | 0.963 |
|       | 2021/10/27 | 72 | 1005 | 1 | 3  | 1 | 0.972 | 3  | 1 | 0.972 | 5  | 1 | 0.944 | 4  | 1 | 0.958 | 2 | 1 | 0.986 |
|       | 2021/10/28 | 77 | 1057 | 0 | 9  | / | 0.883 | 5  | / | 0.935 | 7  | / | 0.909 | 7  | / | 0.909 | 4 | / | 0.948 |
|       | 2021/10/29 | 73 | 1115 | 0 | 10 | / | 0.863 | 13 | / | 0.822 | 15 | / | 0.795 | 11 | / | 0.849 | 9 | / | 0.877 |
|       | 2021/10/30 | 30 | 1169 | 0 | 2  | / | 0.933 | 1  | / | 0.967 | 3  | / | 0.900 | 3  | / | 0.900 | 1 | / | 0.967 |
|       | 2021/10/31 | 18 | 1179 | 0 | 0  | / | 1.000 | 1  | / | 0.944 | 0  | / | 1.000 | 0  | / | 1.000 | 1 | / | 0.944 |
| China | 2022/5/1   | 20 | 338  | 0 | 3  | / | 0.850 | 2  | / | 0.900 | 3  | / | 0.850 | 3  | / | 0.850 | 3 | / | 0.850 |
|       | 2022/5/2   | 21 | 358  | 0 | 4  | / | 0.810 | 4  | / | 0.810 | 6  | / | 0.714 | 6  | / | 0.714 | 2 | / | 0.905 |
|       | 2022/5/3   | 27 | 378  | 0 | 2  | / | 0.926 | 2  | / | 0.926 | 4  | / | 0.852 | 4  | / | 0.852 | 1 | / | 0.963 |
|       | 2022/5/4   | 26 | 401  | 0 | 2  | / | 0.923 | 2  | / | 0.923 | 2  | / | 0.923 | 2  | / | 0.923 | 2 | / | 0.923 |

|          |           |     |      |   |    |   |       |    |   |       |    |   |       |    |   |       |    |   |       |
|----------|-----------|-----|------|---|----|---|-------|----|---|-------|----|---|-------|----|---|-------|----|---|-------|
|          | 2022/5/5  | 28  | 415  | 0 | 7  | / | 0.750 | 8  | / | 0.714 | 8  | / | 0.714 | 8  | / | 0.714 | 7  | / | 0.750 |
|          | 2022/5/6  | 3   | 439  | 1 | 0  | 0 | 1.000 | 0  | 0 | 1.000 | 0  | 0 | 1.000 | 0  | 0 | 1.000 | 0  | 0 | 1.000 |
|          | 2022/5/7  | 20  | 440  | 0 | 4  | / | 0.800 | 2  | / | 0.900 | 3  | / | 0.850 | 3  | / | 0.850 | 3  | / | 0.850 |
|          | 2022/5/8  | 28  | 448  | 0 | 0  | / | 1.000 | 1  | / | 0.964 | 1  | / | 0.964 | 1  | / | 0.964 | 1  | / | 0.964 |
|          | 2022/5/9  | 13  | 470  | 0 | 2  | / | 0.846 | 2  | / | 0.846 | 2  | / | 0.846 | 2  | / | 0.846 | 2  | / | 0.846 |
|          | 2022/5/10 | 14  | 477  | 0 | 3  | / | 0.786 | 3  | / | 0.786 | 3  | / | 0.786 | 3  | / | 0.786 | 3  | / | 0.786 |
|          | 2022/5/11 | 15  | 482  | 0 | 1  | / | 0.933 | 1  | / | 0.933 | 2  | / | 0.867 | 2  | / | 0.867 | 2  | / | 0.867 |
|          | 2022/5/12 | 31  | 489  | 0 | 2  | / | 0.935 | 6  | / | 0.806 | 2  | / | 0.935 | 2  | / | 0.935 | 2  | / | 0.935 |
|          | 2022/5/13 | 16  | 510  | 0 | 1  | / | 0.938 | 1  | / | 0.938 | 1  | / | 0.938 | 1  | / | 0.938 | 2  | / | 0.875 |
|          | 2022/5/14 | 19  | 523  | 0 | 1  | / | 0.947 | 1  | / | 0.947 | 1  | / | 0.947 | 1  | / | 0.947 | 1  | / | 0.947 |
|          | 2022/5/15 | 23  | 538  | 0 | 0  | / | 1.000 | 0  | / | 1.000 | 0  | / | 1.000 | 0  | / | 1.000 | 0  | / | 1.000 |
|          | 2022/5/16 | 26  | 559  | 0 | 0  | / | 1.000 | 0  | / | 1.000 | 0  | / | 1.000 | 0  | / | 1.000 | 0  | / | 1.000 |
|          | 2022/5/17 | 14  | 580  | 0 | 0  | / | 1.000 | 0  | / | 1.000 | 0  | / | 1.000 | 0  | / | 1.000 | 0  | / | 1.000 |
|          | 2022/5/18 | 24  | 591  | 0 | 0  | / | 1.000 | 0  | / | 1.000 | 0  | / | 1.000 | 0  | / | 1.000 | 0  | / | 1.000 |
|          | 2022/5/19 | 21  | 607  | 0 | 0  | / | 1.000 | 0  | / | 1.000 | 0  | / | 1.000 | 0  | / | 1.000 | 0  | / | 1.000 |
|          | 2022/5/20 | 31  | 622  | 0 | 0  | / | 1.000 | 0  | / | 1.000 | 0  | / | 1.000 | 0  | / | 1.000 | 0  | / | 1.000 |
|          | 2022/5/21 | 25  | 651  | 0 | 0  | / | 1.000 | 0  | / | 1.000 | 0  | / | 1.000 | 0  | / | 1.000 | 0  | / | 1.000 |
|          | 2022/5/22 | 32  | 676  | 0 | 0  | / | 1.000 | 0  | / | 1.000 | 0  | / | 1.000 | 0  | / | 1.000 | 0  | / | 1.000 |
|          | 2022/5/23 | 18  | 699  | 0 | 0  | / | 1.000 | 0  | / | 1.000 | 0  | / | 1.000 | 0  | / | 1.000 | 0  | / | 1.000 |
|          | 2022/5/24 | 17  | 691  | 0 | 0  | / | 1.000 | 0  | / | 1.000 | 0  | / | 1.000 | 0  | / | 1.000 | 0  | / | 1.000 |
|          | 2022/5/25 | 20  | 691  | 0 | 0  | / | 1.000 | 1  | / | 0.950 | 0  | / | 1.000 | 0  | / | 1.000 | 0  | / | 1.000 |
|          | 2022/5/26 | 17  | 693  | 0 | 0  | / | 1.000 | 0  | / | 1.000 | 0  | / | 1.000 | 0  | / | 1.000 | 0  | / | 1.000 |
|          | 2022/5/27 | 12  | 672  | 0 | 0  | / | 1.000 | 0  | / | 1.000 | 0  | / | 1.000 | 0  | / | 1.000 | 0  | / | 1.000 |
|          | 2022/5/28 | 11  | 658  | 0 | 0  | / | 1.000 | 1  | / | 0.909 | 0  | / | 1.000 | 0  | / | 1.000 | 4  | / | 0.636 |
|          | 2022/5/29 | 7   | 638  | 0 | 0  | / | 1.000 | 0  | / | 1.000 | 0  | / | 1.000 | 0  | / | 1.000 | 0  | / | 1.000 |
|          | 2022/5/30 | 9   | 608  | 1 | 0  | 0 | 1.000 | 0  | 0 | 1.000 | 0  | 0 | 1.000 | 0  | 0 | 1.000 | 1  | 1 | 1.000 |
|          | 2022/5/31 | 19  | 588  | 0 | 0  | / | 1.000 | 2  | / | 0.895 | 0  | / | 1.000 | 0  | / | 1.000 | 1  | / | 0.947 |
| Portugal | 2021/4/1  | 12  | 1010 | 0 | 5  | / | 0.583 | 8  | / | 0.333 | 4  | / | 0.667 | 5  | / | 0.583 | 5  | / | 0.583 |
|          | 2021/4/2  | 8   | 911  | 0 | 1  | / | 0.875 | 1  | / | 0.875 | 1  | / | 0.875 | 1  | / | 0.875 | 1  | / | 0.875 |
|          | 2021/4/3  | 5   | 798  | 0 | 0  | / | 1.000 | 0  | / | 1.000 | 0  | / | 1.000 | 0  | / | 1.000 | 0  | / | 1.000 |
|          | 2021/4/4  | 8   | 710  | 0 | 1  | / | 0.875 | 1  | / | 0.875 | 1  | / | 0.875 | 1  | / | 0.875 | 1  | / | 0.875 |
|          | 2021/4/5  | 233 | 616  | 1 | 51 | 0 | 0.780 | 49 | 1 | 0.793 | 48 | 0 | 0.793 | 51 | 0 | 0.780 | 41 | 0 | 0.823 |

|  |           |     |      |   |    |   |       |    |   |       |    |   |       |    |   |       |    |   |       |
|--|-----------|-----|------|---|----|---|-------|----|---|-------|----|---|-------|----|---|-------|----|---|-------|
|  | 2021/4/6  | 196 | 790  | 1 | 12 | 0 | 0.938 | 9  | 0 | 0.954 | 13 | 0 | 0.933 | 13 | 0 | 0.933 | 9  | 0 | 0.954 |
|  | 2021/4/7  | 166 | 942  | 0 | 36 | / | 0.783 | 31 | / | 0.813 | 38 | / | 0.771 | 38 | / | 0.771 | 33 | / | 0.801 |
|  | 2021/4/8  | 189 | 1023 | 0 | 8  | / | 0.958 | 6  | / | 0.968 | 7  | / | 0.963 | 7  | / | 0.963 | 6  | / | 0.968 |
|  | 2021/4/9  | 200 | 1154 | 0 | 12 | / | 0.940 | 9  | / | 0.955 | 13 | / | 0.935 | 13 | / | 0.935 | 10 | / | 0.950 |
|  | 2021/4/10 | 126 | 1277 | 0 | 7  | / | 0.944 | 6  | / | 0.952 | 10 | / | 0.921 | 10 | / | 0.921 | 7  | / | 0.944 |
|  | 2021/4/11 | 50  | 1331 | 0 | 1  | / | 0.980 | 2  | / | 0.960 | 1  | / | 0.980 | 1  | / | 0.980 | 3  | / | 0.940 |
|  | 2021/4/12 | 78  | 1335 | 0 | 5  | / | 0.936 | 5  | / | 0.936 | 5  | / | 0.936 | 5  | / | 0.936 | 5  | / | 0.936 |
|  | 2021/4/13 | 80  | 1364 | 0 | 5  | / | 0.938 | 13 | / | 0.838 | 4  | / | 0.950 | 5  | / | 0.938 | 5  | / | 0.938 |
|  | 2021/4/14 | 63  | 1419 | 0 | 6  | / | 0.905 | 5  | / | 0.921 | 5  | / | 0.921 | 6  | / | 0.905 | 6  | / | 0.905 |
|  | 2021/4/15 | 82  | 1469 | 0 | 4  | / | 0.951 | 24 | / | 0.707 | 3  | / | 0.963 | 3  | / | 0.963 | 3  | / | 0.963 |
|  | 2021/4/16 | 60  | 1547 | 0 | 7  | / | 0.883 | 8  | / | 0.867 | 8  | / | 0.867 | 8  | / | 0.867 | 6  | / | 0.900 |
|  | 2021/4/17 | 42  | 1600 | 0 | 0  | / | 1.000 | 0  | / | 1.000 | 0  | / | 1.000 | 0  | / | 1.000 | 0  | / | 1.000 |
|  | 2021/4/18 | 21  | 1641 | 1 | 0  | 0 | 1.000 | 0  | 0 | 1.000 | 0  | 0 | 1.000 | 0  | 0 | 1.000 | 0  | 0 | 1.000 |
|  | 2021/4/19 | 30  | 1657 | 0 | 3  | / | 0.900 | 3  | / | 0.900 | 3  | / | 0.900 | 3  | / | 0.900 | 3  | / | 0.900 |
|  | 2021/4/20 | 5   | 1686 | 0 | 1  | / | 0.800 | 1  | / | 0.800 | 1  | / | 0.800 | 1  | / | 0.800 | 1  | / | 0.800 |
|  | 2021/4/21 | 9   | 1691 | 1 | 2  | 1 | 0.875 | 2  | 1 | 0.875 | 2  | 1 | 0.875 | 2  | 1 | 0.875 | 2  | 1 | 0.875 |
|  | 2021/4/22 | 2   | 1697 | 0 | 0  | / | 1.000 | 0  | / | 1.000 | 0  | / | 1.000 | 0  | / | 1.000 | 0  | / | 1.000 |
|  | 2021/4/23 | 1   | 1696 | 0 | 0  | / | 1.000 | 1  | / | 0.000 | 0  | / | 1.000 | 0  | / | 1.000 | 0  | / | 1.000 |
|  | 2021/4/24 | 6   | 1696 | 0 | 0  | / | 1.000 | 3  | / | 0.500 | 0  | / | 1.000 | 0  | / | 1.000 | 0  | / | 1.000 |
|  | 2021/4/25 | 1   | 1696 | 0 | 1  | / | 0.000 | 1  | / | 0.000 | 1  | / | 0.000 | 1  | / | 0.000 | 1  | / | 0.000 |
|  | 2021/4/26 | 4   | 1692 | 0 | 2  | / | 0.500 | 1  | / | 0.750 | 2  | / | 0.500 | 2  | / | 0.500 | 1  | / | 0.750 |
|  | 2021/4/27 | 11  | 1695 | 0 | 0  | / | 1.000 | 0  | / | 1.000 | 1  | / | 0.909 | 1  | / | 0.909 | 1  | / | 0.909 |
|  | 2021/4/28 | 3   | 1705 | 0 | 1  | / | 0.667 | 1  | / | 0.667 | 1  | / | 0.667 | 1  | / | 0.667 | 1  | / | 0.667 |
|  | 2021/4/29 | 1   | 1704 | 0 | 1  | / | 0.000 | 1  | / | 0.000 | 1  | / | 0.000 | 1  | / | 0.000 | 1  | / | 0.000 |
|  | 2021/4/30 | 8   | 1697 | 0 | 0  | / | 1.000 | 0  | / | 1.000 | 0  | / | 1.000 | 0  | / | 1.000 | 0  | / | 1.000 |

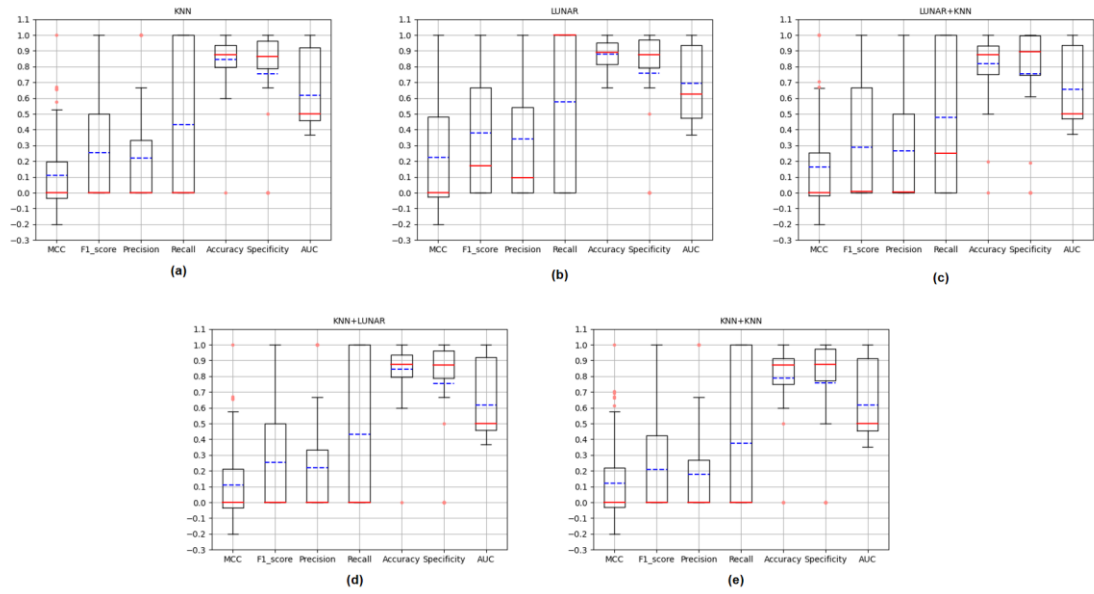

**Figure S1.** Compare the detection of all critical variants on the days they first appeared in three countries (consider VOC/VOI as critical variants). (a) The evaluation metrics of KNN; (b) the evaluation metrics of LUNAR; (c) the evaluation metrics of LUNAR+KNN; (d) the evaluation metrics of KNN+LUNAR; (e) the evaluation metrics of KNN+KNN. The red lines in the boxplots indicate the medians, the blue lines indicate the mean values, and the pink dots indicate the outliers.

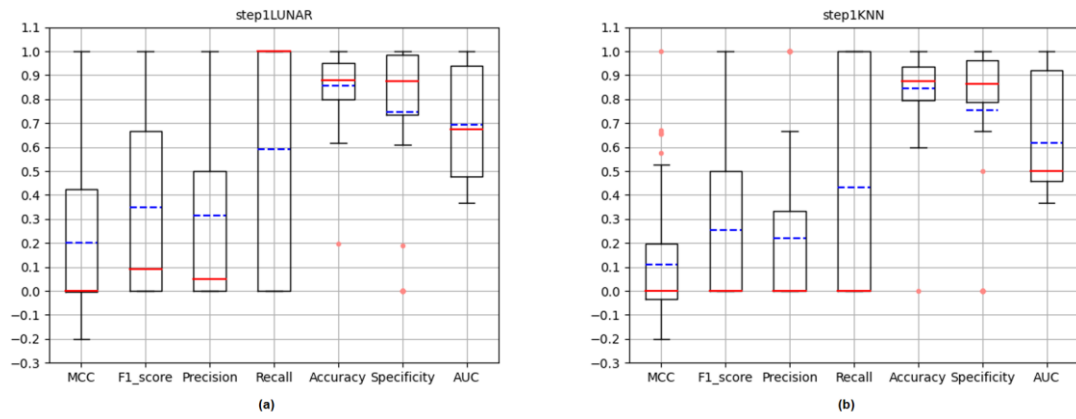

**Figure S2.** Compare the new variant detection of all critical variants on the days they first appeared in three countries (consider VOC/VOI as critical variants). **(a)** The evaluation metrics of LUNAR; **(b)** the evaluation metrics of KNN. The red lines in the boxplots indicate the medians, the blue lines indicate the mean values, and the pink dots indicate the outliers.



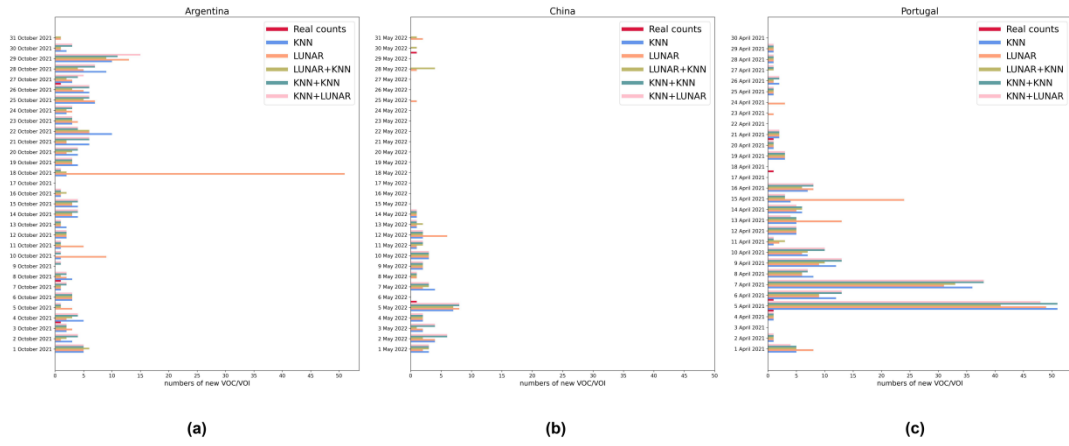

**Figure S3.** Analog dynamic monitoring of the new critical variants in three countries during a certain period (consider VOC/VOI as critical variants). **(a)** Comparison of the predicted quantity with the actual quantity in Argentina; **(b)** comparison of the predicted quantity with the actual quantity in China; **(c)** comparison of the predicted quantity with the actual quantity in Portugal

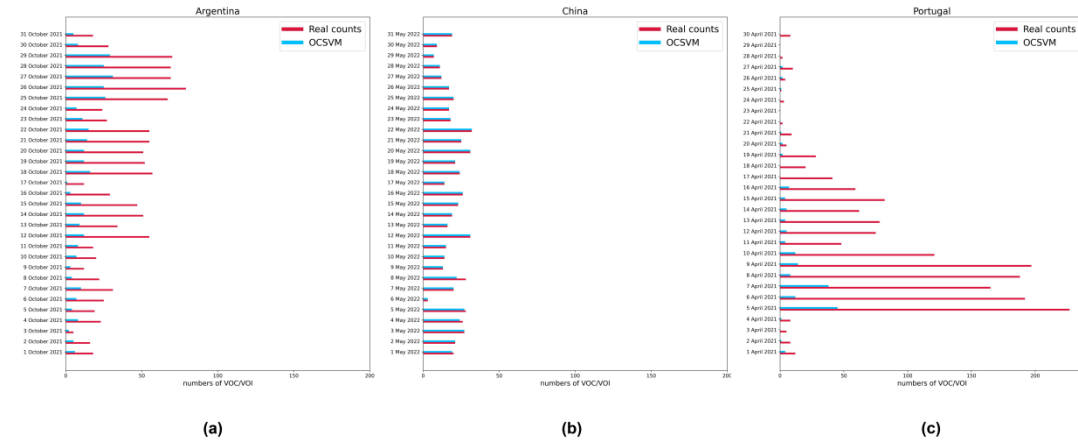

**Figure S4.** Analog dynamic monitoring of the critical variants in three countries during a certain period using OCSVM (consider VOC/VOI as critical variants). **(a)** Comparison of the predicted quantity with the actual quantity in Argentina; **(b)** comparison of the predicted quantity with the actual quantity in China; **(c)** comparison of the predicted quantity with the actual quantity in Portugal

## References

30. Li, Z.; Zhao, Y.; Hu, X.; Botta, N.; Ionescu, C.; Chen, G. ECOD: Unsupervised Outlier Detection Using Empirical Cumulative Distribution Functions. *IEEE Trans. Knowl. Data Eng.* **2022**, *35*, 12181–12193. <https://doi.org/10.1109/TKDE.2022.3159580>.
31. Schölkopf, B.; Williamson, R.; Smola, A.; Shawe-Taylor, J.; Platt, J. Support Vector Method for Novelty Detection. In Proceedings of 12th International Conference on Neural Information Processing Systems, Denver, CO, USA, 29 November–4 December 1999; pp. 582–588.
32. Angiulli, F.; Pizzuti, C. Fast Outlier Detection in High Dimensional Spaces. In *Principles of Data Mining and Knowledge Discovery*; Springer: Berlin/Heidelberg, Germany, 2002; pp. 15–27.
33. Liu, F.T.; Ting, K.M.; Zhou, Z.-H. Isolation-Based Anomaly Detection. *ACM Trans. Knowl. Discov. Data* **2012**, *6*, 1–39. <https://doi.org/10.1145/2133360.2133363>.
34. Michelucci, U. Autoencoders. In *Applied Deep Learning with TensorFlow 2: Learn to Implement Advanced Deep Learning Techniques with Python*; Apress: Berkeley, CA, USA, 2022; pp. 257–283. [https://doi.org/10.1007/978-1-4842-8020-1\\_9](https://doi.org/10.1007/978-1-4842-8020-1_9).
35. Goodge, A.; Hooi, B.; Ng, S.K.; Ng, W.S. LUNAR: Unifying Local Outlier Detection Methods via Graph Neural Networks. *AAAI Conf. Artif. Intell.* **2022**, *36*, 6737–6745.
